# Supplementary material
Source: publisher figshare collection journal article supplement (https://gsajournals.figshare.com/ndownloader/files/14675390)
Supplement: Supplementary file 1 [file 14675390]

## Sheet: #1a
frame	time	PC	TB	ant isth	mid isth	post isth		2014-01-08
100	00:00:03.913000
101	00:00:03.953000
102	00:00:03.992000
103	00:00:04.032000
104	00:00:04.071000
105	00:00:04.111000
106	00:00:04.150000
107	00:00:04.190000
108	00:00:04.229000
109	00:00:04.269000
110	00:00:04.308000
111	00:00:04.348000
112	00:00:04.387000
113	00:00:04.427000
114	00:00:04.466000
115	00:00:04.506000
116	00:00:04.545000
117	00:00:04.585000
118	00:00:04.624000
119	00:00:04.664000
120	00:00:04.703000
121	00:00:04.743000
122	00:00:04.782000
123	00:00:04.822000
124	00:00:04.861000
125	00:00:04.901000
126	00:00:04.940000
127	00:00:04.980000
128	00:00:05.019000
129	00:00:05.059000
130	00:00:05.098000
131	00:00:05.138000
132	00:00:05.177000
133	00:00:05.217000
134	00:00:05.257000
135	00:00:05.296000
136	00:00:05.335000
137	00:00:05.375000
138	00:00:05.415000
139	00:00:05.454000
140	00:00:05.494000
141	00:00:05.533000
142	00:00:05.573000
143	00:00:05.612000
144	00:00:05.652000
145	00:00:05.691000
146	00:00:05.731000
147	00:00:05.770000
148	00:00:05.810000
149	00:00:05.849000
150	00:00:05.889000
151	00:00:05.928000
152	00:00:05.968000
153	00:00:06.007000
154	00:00:06.047000
155	00:00:06.086000
156	00:00:06.126000
157	00:00:06.165000
158	00:00:06.205000
159	00:00:06.244000
160	00:00:06.284000
161	00:00:06.323000
162	00:00:06.363000
163	00:00:06.402000
164	00:00:06.442000
165	00:00:06.481000
166	00:00:06.521000
167	00:00:06.560000
168	00:00:06.600000
169	00:00:06.639000
170	00:00:06.679000
171	00:00:06.718000
172	00:00:06.758000
173	00:00:06.797000
174	00:00:06.837000
175	00:00:06.877000
176	00:00:06.916000
177	00:00:06.956000
178	00:00:06.995000
179	00:00:07.035000
180	00:00:07.074000
181	00:00:07.114000
182	00:00:07.153000
183	00:00:07.193000
184	00:00:07.232000
185	00:00:07.272000
186	00:00:07.311000
187	00:00:07.351000
188	00:00:07.390000
189	00:00:07.430000
190	00:00:07.469000
191	00:00:07.510000
192	00:00:07.549000
193	00:00:07.589000
194	00:00:07.628000
195	00:00:07.668000
196	00:00:07.707000
197	00:00:07.747000
198	00:00:07.786000
199	00:00:07.826000
200	00:00:07.865000
201	00:00:07.905000
202	00:00:07.944000
203	00:00:07.984000
204	00:00:08.023000
205	00:00:08.063000
206	00:00:08.102000
207	00:00:08.142000
208	00:00:08.181000
209	00:00:08.221000
210	00:00:08.260000
211	00:00:08.300000
212	00:00:08.339000
213	00:00:08.379000
214	00:00:08.419000
215	00:00:08.458000
216	00:00:08.498000
217	00:00:08.537000
218	00:00:08.577000
219	00:00:08.616000
220	00:00:08.655000
221	00:00:08.695000
222	00:00:08.735000
223	00:00:08.774000
224	00:00:08.814000
225	00:00:08.853000
226	00:00:08.893000
227	00:00:08.932000
228	00:00:08.972000
229	00:00:09.011000
230	00:00:09.051000
231	00:00:09.090000
232	00:00:09.130000
233	00:00:09.169000
234	00:00:09.209000
235	00:00:09.248000
236	00:00:09.288000
237	00:00:09.327000
238	00:00:09.367000
239	00:00:09.406000
240	00:00:09.446000
241	00:00:09.485000
242	00:00:09.525000
243	00:00:09.564000
244	00:00:09.604000
245	00:00:09.643000
246	00:00:09.683000
247	00:00:09.722000
248	00:00:09.762000
249	00:00:09.801000
250	00:00:09.841000
251	00:00:09.880000
252	00:00:09.920000
253	00:00:09.959000
254	00:00:09.999000
255	00:00:10.038000
256	00:00:10.078000
257	00:00:10.117000
258	00:00:10.157000
259	00:00:10.197000
260	00:00:10.236000
261	00:00:10.276000
262	00:00:10.315000
263	00:00:10.355000
264	00:00:10.394000
265	00:00:10.434000
266	00:00:10.473000
267	00:00:10.513000
268	00:00:10.552000
269	00:00:10.592000
270	00:00:10.631000
271	00:00:10.671000
272	00:00:10.710000
273	00:00:10.750000
274	00:00:10.789000
275	00:00:10.829000
276	00:00:10.868000
277	00:00:10.908000
278	00:00:10.947000
279	00:00:10.987000
280	00:00:11.026000
281	00:00:11.066000
282	00:00:11.105000
283	00:00:11.145000
284	00:00:11.184000
285	00:00:11.224000
286	00:00:11.263000
287	00:00:11.303000
288	00:00:11.342000
289	00:00:11.382000
290	00:00:11.421000
291	00:00:11.461000
292	00:00:11.500000
293	00:00:11.540000
294	00:00:11.579000
295	00:00:11.619000
296	00:00:11.658000
297	00:00:11.698000
298	00:00:11.738000
299	00:00:11.777000
300	00:00:11.817000
301	00:00:11.856000
302	00:00:11.896000
303	00:00:11.935000
304	00:00:11.975000
305	00:00:12.014000
306	00:00:12.054000
307	00:00:12.093000
308	00:00:12.133000
309	00:00:12.172000
310	00:00:12.212000
311	00:00:12.251000
312	00:00:12.291000
313	00:00:12.330000
314	00:00:12.370000
315	00:00:12.409000
316	00:00:12.449000
317	00:00:12.488000
318	00:00:12.529000
319	00:00:12.568000
320	00:00:12.608000
321	00:00:12.647000
322	00:00:12.687000
323	00:00:12.726000
324	00:00:12.766000
325	00:00:12.805000
326	00:00:12.845000
327	00:00:12.884000
328	00:00:12.924000
329	00:00:12.963000
330	00:00:13.003000
331	00:00:13.042000
332	00:00:13.082000
333	00:00:13.121000
334	00:00:13.161000
335	00:00:13.200000
336	00:00:13.240000
337	00:00:13.280000
338	00:00:13.319000
339	00:00:13.359000
340	00:00:13.398000
341	00:00:13.438000
342	00:00:13.477000
343	00:00:13.517000
344	00:00:13.556000
345	00:00:13.596000
346	00:00:13.635000
347	00:00:13.675000
348	00:00:13.714000
349	00:00:13.754000
350	00:00:13.793000
351	00:00:13.833000
352	00:00:13.872000
353	00:00:13.912000
354	00:00:13.951000
355	00:00:13.991000
356	00:00:14.030000
357	00:00:14.070000
358	00:00:14.109000
359	00:00:14.149000
360	00:00:14.188000
361	00:00:14.228000
362	00:00:14.267000
363	00:00:14.307000
364	00:00:14.346000
365	00:00:14.386000
366	00:00:14.425000
367	00:00:14.465000
368	00:00:14.504000
369	00:00:14.544000
370	00:00:14.583000
371	00:00:14.623000
372	00:00:14.662000
373	00:00:14.702000
374	00:00:14.742000
375	00:00:14.781000
376	00:00:14.820000
377	00:00:14.860000
378	00:00:14.899000
379	00:00:14.939000
380	00:00:14.978000
381	00:00:15.018000
382	00:00:15.058000
383	00:00:15.097000
384	00:00:15.137000
385	00:00:15.176000
386	00:00:15.216000
387	00:00:15.255000
388	00:00:15.295000
389	00:00:15.334000
390	00:00:15.374000
391	00:00:15.413000
392	00:00:15.453000
393	00:00:15.492000
394	00:00:15.532000
395	00:00:15.571000
396	00:00:15.611000
397	00:00:15.650000
398	00:00:15.690000
399	00:00:15.729000
400	00:00:15.769000
401	00:00:15.808000
402	00:00:15.848000
403	00:00:15.887000
404	00:00:15.927000
405	00:00:15.966000
406	00:00:16.006000
407	00:00:16.045000
408	00:00:16.085000
409	00:00:16.124000
410	00:00:16.164000
411	00:00:16.203000
412	00:00:16.243000
413	00:00:16.282000
414	00:00:16.322000
415	00:00:16.361000
416	00:00:16.401000
417	00:00:16.440000
418	00:00:16.480000
419	00:00:16.519000
420	00:00:16.559000
421	00:00:16.599000
422	00:00:16.638000
423	00:00:16.678000
424	00:00:16.717000
425	00:00:16.757000
426	00:00:16.796000
427	00:00:16.836000
428	00:00:16.875000
429	00:00:16.915000
430	00:00:16.954000
431	00:00:16.994000
432	00:00:17.033000
433	00:00:17.073000
434	00:00:17.112000
435	00:00:17.152000
436	00:00:17.191000
437	00:00:17.231000
438	00:00:17.270000
439	00:00:17.310000
440	00:00:17.349000
441	00:00:17.389000
442	00:00:17.428000
443	00:00:17.468000
444	00:00:17.508000
445	00:00:17.548000
446	00:00:17.587000
447	00:00:17.627000
448	00:00:17.666000
449	00:00:17.706000
450	00:00:17.745000
451	00:00:17.785000
452	00:00:17.824000
453	00:00:17.864000
454	00:00:17.903000
455	00:00:17.943000
456	00:00:17.982000
457	00:00:18.022000
458	00:00:18.061000
459	00:00:18.101000
460	00:00:18.141000
461	00:00:18.180000
462	00:00:18.220000
463	00:00:18.259000
464	00:00:18.299000
465	00:00:18.338000
466	00:00:18.378000
467	00:00:18.417000
468	00:00:18.457000
469	00:00:18.496000
470	00:00:18.536000
471	00:00:18.575000
472	00:00:18.615000
473	00:00:18.654000
474	00:00:18.694000
475	00:00:18.733000
476	00:00:18.773000
477	00:00:18.812000
478	00:00:18.852000
479	00:00:18.891000
480	00:00:18.931000
481	00:00:18.970000
482	00:00:19.010000
483	00:00:19.049000
484	00:00:19.089000
485	00:00:19.128000
486	00:00:19.168000
487	00:00:19.207000
488	00:00:19.247000
489	00:00:19.286000
490	00:00:19.326000
491	00:00:19.365000
492	00:00:19.405000
493	00:00:19.444000
494	00:00:19.484000
495	00:00:19.523000
496	00:00:19.563000
497	00:00:19.603000
498	00:00:19.642000
499	00:00:19.681000
500	00:00:19.721000
501	00:00:19.760000
502	00:00:19.800000
503	00:00:19.839000
504	00:00:19.879000
505	00:00:19.919000
506	00:00:19.958000
507	00:00:19.998000
508	00:00:20.037000
509	00:00:20.077000
510	00:00:20.116000
511	00:00:20.156000
512	00:00:20.195000
513	00:00:20.235000
514	00:00:20.274000
515	00:00:20.314000
516	00:00:20.353000
517	00:00:20.393000
518	00:00:20.432000
519	00:00:20.472000
520	00:00:20.511000
521	00:00:20.551000
522	00:00:20.590000
523	00:00:20.630000
524	00:00:20.669000
525	00:00:20.709000
526	00:00:20.748000
527	00:00:20.788000
528	00:00:20.827000
529	00:00:20.867000
530	00:00:20.906000
531	00:00:20.946000
532	00:00:20.985000
533	00:00:21.025000
534	00:00:21.064000
535	00:00:21.104000
536	00:00:21.143000
537	00:00:21.183000
538	00:00:21.222000
539	00:00:21.262000
540	00:00:21.301000
541	00:00:21.341000
542	00:00:21.380000
543	00:00:21.420000
544	00:00:21.460000
545	00:00:21.499000
546	00:00:21.539000
547	00:00:21.578000
548	00:00:21.618000
549	00:00:21.657000
550	00:00:21.697000
551	00:00:21.736000
552	00:00:21.776000
553	00:00:21.815000
554	00:00:21.855000
555	00:00:21.894000
556	00:00:21.934000
557	00:00:21.973000
558	00:00:22.013000
559	00:00:22.052000
560	00:00:22.092000
561	00:00:22.131000
562	00:00:22.171000
563	00:00:22.210000
564	00:00:22.250000
565	00:00:22.289000
566	00:00:22.329000
567	00:00:22.368000
568	00:00:22.408000
569	00:00:22.447000
570	00:00:22.487000
571	00:00:22.527000
572	00:00:22.567000
573	00:00:22.606000
574	00:00:22.646000
575	00:00:22.685000
576	00:00:22.725000
577	00:00:22.764000
578	00:00:22.804000
579	00:00:22.843000
580	00:00:22.883000
581	00:00:22.923000
582	00:00:22.962000
583	00:00:23.002000
584	00:00:23.041000
585	00:00:23.081000
586	00:00:23.120000
587	00:00:23.160000
588	00:00:23.199000
589	00:00:23.239000
590	00:00:23.278000
591	00:00:23.318000
592	00:00:23.357000
593	00:00:23.397000
594	00:00:23.436000
595	00:00:23.476000
596	00:00:23.515000
597	00:00:23.555000
598	00:00:23.594000
599	00:00:23.634000
600	00:00:23.673000
601	00:00:23.713000
602	00:00:23.752000
603	00:00:23.792000
604	00:00:23.831000
605	00:00:23.871000
606	00:00:23.910000
607	00:00:23.950000
608	00:00:23.989000
609	00:00:24.029000
610	00:00:24.068000
611	00:00:24.108000
612	00:00:24.147000
613	00:00:24.187000
614	00:00:24.226000
615	00:00:24.266000
616	00:00:24.305000
617	00:00:24.345000
618	00:00:24.384000
619	00:00:24.424000
620	00:00:24.463000
621	00:00:24.503000
622	00:00:24.543000
623	00:00:24.582000
624	00:00:24.621000
625	00:00:24.661000
626	00:00:24.700000
627	00:00:24.740000
628	00:00:24.780000
629	00:00:24.819000
630	00:00:24.859000
631	00:00:24.898000
632	00:00:24.938000
633	00:00:24.977000
634	00:00:25.017000
635	00:00:25.056000
636	00:00:25.096000
637	00:00:25.135000
638	00:00:25.175000
639	00:00:25.214000
640	00:00:25.254000
641	00:00:25.293000
642	00:00:25.333000
643	00:00:25.372000
644	00:00:25.412000
645	00:00:25.451000
646	00:00:25.491000
647	00:00:25.530000
648	00:00:25.570000
649	00:00:25.609000
650	00:00:25.649000
651	00:00:25.688000
652	00:00:25.728000
653	00:00:25.767000
654	00:00:25.807000
655	00:00:25.846000
656	00:00:25.886000
657	00:00:25.925000
658	00:00:25.965000
659	00:00:26.004000
660	00:00:26.044000
661	00:00:26.083000
662	00:00:26.123000
663	00:00:26.162000
664	00:00:26.202000
665	00:00:26.242000
666	00:00:26.281000
667	00:00:26.321000
668	00:00:26.360000
669	00:00:26.400000
670	00:00:26.439000
671	00:00:26.479000
672	00:00:26.518000
673	00:00:26.558000
674	00:00:26.597000
675	00:00:26.637000
676	00:00:26.676000
677	00:00:26.716000
678	00:00:26.755000
679	00:00:26.795000
680	00:00:26.834000
681	00:00:26.874000
682	00:00:26.913000
683	00:00:26.953000
684	00:00:26.992000
685	00:00:27.032000
686	00:00:27.071000
687	00:00:27.111000
688	00:00:27.150000
689	00:00:27.190000
690	00:00:27.229000
691	00:00:27.269000
692	00:00:27.308000
693	00:00:27.348000
694	00:00:27.387000
695	00:00:27.427000
696	00:00:27.466000
697	00:00:27.507000
698	00:00:27.546000
699	00:00:27.586000
700	00:00:27.625000
701	00:00:27.665000
702	00:00:27.704000
703	00:00:27.744000
704	00:00:27.784000
705	00:00:27.823000
706	00:00:27.863000
707	00:00:27.902000
708	00:00:27.942000
709	00:00:27.981000
710	00:00:28.021000
711	00:00:28.060000
712	00:00:28.100000
713	00:00:28.139000
714	00:00:28.179000
715	00:00:28.218000
716	00:00:28.258000
717	00:00:28.297000
718	00:00:28.337000
719	00:00:28.376000
720	00:00:28.416000
721	00:00:28.455000
722	00:00:28.495000
723	00:00:28.534000
724	00:00:28.574000
725	00:00:28.613000
726	00:00:28.653000
727	00:00:28.692000
728	00:00:28.732000
729	00:00:28.771000
730	00:00:28.811000
731	00:00:28.850000
732	00:00:28.890000
733	00:00:28.929000
734	00:00:28.969000
735	00:00:29.008000
736	00:00:29.048000
737	00:00:29.087000
738	00:00:29.127000
739	00:00:29.166000
740	00:00:29.206000
741	00:00:29.245000
742	00:00:29.285000
743	00:00:29.324000
744	00:00:29.364000
745	00:00:29.403000
746	00:00:29.443000
747	00:00:29.482000
748	00:00:29.522000
749	00:00:29.561000
750	00:00:29.601000
751	00:00:29.641000
752	00:00:29.680000
753	00:00:29.720000
754	00:00:29.759000
755	00:00:29.799000
756	00:00:29.838000
757	00:00:29.878000
758	00:00:29.917000

## Sheet: #2a
frame	time	PC	TB	ant isth	mid isth	post isth
1	00:00:00
2	00:00:00.027000
3	00:00:00.066000
4	00:00:00.106000
5	00:00:00.145000
6	00:00:00.185000
7	00:00:00.224000
8	00:00:00.264000
9	00:00:00.303000
10	00:00:00.343000
11	00:00:00.382000
12	00:00:00.422000
13	00:00:00.461000
14	00:00:00.501000
15	00:00:00.540000
16	00:00:00.580000
17	00:00:00.619000
18	00:00:00.659000
19	00:00:00.698000
20	00:00:00.738000
21	00:00:00.777000
22	00:00:00.817000
23	00:00:00.856000
24	00:00:00.896000
25	00:00:00.936000
26	00:00:00.975000
27	00:00:01.014000
28	00:00:01.054000
29	00:00:01.093000
30	00:00:01.133000
31	00:00:01.172000
32	00:00:01.212000
33	00:00:01.252000
34	00:00:01.291000
35	00:00:01.331000
36	00:00:01.370000
37	00:00:01.410000
38	00:00:01.449000
39	00:00:01.489000
40	00:00:01.528000
41	00:00:01.568000
42	00:00:01.607000
43	00:00:01.647000
44	00:00:01.686000
45	00:00:01.726000
46	00:00:01.765000
47	00:00:01.805000
48	00:00:01.844000
49	00:00:01.884000
50	00:00:01.923000
51	00:00:01.963000
52	00:00:02.002000
53	00:00:02.042000
54	00:00:02.081000
55	00:00:02.121000
56	00:00:02.160000
57	00:00:02.200000
58	00:00:02.239000
59	00:00:02.279000
60	00:00:02.318000
61	00:00:02.358000
62	00:00:02.397000
63	00:00:02.437000
64	00:00:02.476000
65	00:00:02.517000
66	00:00:02.556000
67	00:00:02.596000
68	00:00:02.635000
69	00:00:02.675000
70	00:00:02.715000
71	00:00:02.754000
72	00:00:02.794000
73	00:00:02.833000
74	00:00:02.873000
75	00:00:02.912000
76	00:00:02.952000
77	00:00:02.991000
78	00:00:03.031000
79	00:00:03.070000
80	00:00:03.110000
81	00:00:03.149000
82	00:00:03.189000
83	00:00:03.228000
84	00:00:03.268000
85	00:00:03.307000
86	00:00:03.347000
87	00:00:03.386000
88	00:00:03.426000
89	00:00:03.465000
90	00:00:03.505000
91	00:00:03.544000
92	00:00:03.584000
93	00:00:03.623000
94	00:00:03.663000
95	00:00:03.702000
96	00:00:03.742000
97	00:00:03.781000
98	00:00:03.821000
99	00:00:03.860000
100	00:00:03.900000
101	00:00:03.939000
102	00:00:03.979000
103	00:00:04.018000
104	00:00:04.058000
105	00:00:04.097000
106	00:00:04.137000
107	00:00:04.176000
108	00:00:04.216000
109	00:00:04.256000
110	00:00:04.295000
111	00:00:04.335000
112	00:00:04.374000
113	00:00:04.414000
114	00:00:04.453000
115	00:00:04.493000
116	00:00:04.532000
117	00:00:04.572000
118	00:00:04.611000
119	00:00:04.651000
120	00:00:04.690000
121	00:00:04.730000
122	00:00:04.769000
123	00:00:04.809000
124	00:00:04.848000
125	00:00:04.888000
126	00:00:04.927000
127	00:00:04.967000
128	00:00:05.006000
129	00:00:05.046000
130	00:00:05.085000
131	00:00:05.125000
132	00:00:05.164000
133	00:00:05.204000
134	00:00:05.243000
135	00:00:05.283000
136	00:00:05.322000
137	00:00:05.362000
138	00:00:05.401000
139	00:00:05.441000
140	00:00:05.480000
141	00:00:05.520000
142	00:00:05.559000
143	00:00:05.599000
144	00:00:05.638000
145	00:00:05.678000
146	00:00:05.717000
147	00:00:05.757000
148	00:00:05.797000
149	00:00:05.836000
150	00:00:05.875000
151	00:00:05.915000
152	00:00:05.954000
153	00:00:05.994000
154	00:00:06.033000
155	00:00:06.073000
156	00:00:06.113000
157	00:00:06.152000
158	00:00:06.192000
159	00:00:06.231000
160	00:00:06.271000
161	00:00:06.310000
162	00:00:06.350000
163	00:00:06.389000
164	00:00:06.429000
165	00:00:06.468000
166	00:00:06.508000
167	00:00:06.547000
168	00:00:06.587000
169	00:00:06.626000
170	00:00:06.666000
171	00:00:06.705000
172	00:00:06.745000
173	00:00:06.784000
174	00:00:06.824000
175	00:00:06.863000
176	00:00:06.903000
177	00:00:06.942000
178	00:00:06.982000
179	00:00:07.021000
180	00:00:07.061000
181	00:00:07.100000
182	00:00:07.140000
183	00:00:07.179000
184	00:00:07.219000
185	00:00:07.258000
186	00:00:07.298000
187	00:00:07.337000
188	00:00:07.377000
189	00:00:07.416000
190	00:00:07.456000
191	00:00:07.495000
192	00:00:07.536000
193	00:00:07.576000
194	00:00:07.615000
195	00:00:07.655000
196	00:00:07.694000
197	00:00:07.734000
198	00:00:07.773000
199	00:00:07.813000
200	00:00:07.852000
201	00:00:07.892000
202	00:00:07.931000
203	00:00:07.971000
204	00:00:08.010000
205	00:00:08.050000
206	00:00:08.089000
207	00:00:08.129000
208	00:00:08.168000
209	00:00:08.208000
210	00:00:08.247000
211	00:00:08.287000
212	00:00:08.326000
213	00:00:08.366000
214	00:00:08.405000
215	00:00:08.445000
216	00:00:08.484000
217	00:00:08.524000
218	00:00:08.563000
219	00:00:08.603000
220	00:00:08.642000
221	00:00:08.682000
222	00:00:08.721000
223	00:00:08.761000
224	00:00:08.800000
225	00:00:08.840000
226	00:00:08.879000
227	00:00:08.919000
228	00:00:08.958000
229	00:00:08.998000
230	00:00:09.037000
231	00:00:09.077000
232	00:00:09.117000
233	00:00:09.156000
234	00:00:09.196000
235	00:00:09.235000
236	00:00:09.275000
237	00:00:09.314000
238	00:00:09.354000
239	00:00:09.393000
240	00:00:09.433000
241	00:00:09.472000
242	00:00:09.512000
243	00:00:09.551000
244	00:00:09.591000
245	00:00:09.630000
246	00:00:09.670000
247	00:00:09.709000
248	00:00:09.749000
249	00:00:09.788000
250	00:00:09.828000
251	00:00:09.867000
252	00:00:09.907000
253	00:00:09.946000
254	00:00:09.986000
255	00:00:10.025000
256	00:00:10.065000
257	00:00:10.104000
258	00:00:10.144000
259	00:00:10.183000
260	00:00:10.223000
261	00:00:10.262000
262	00:00:10.302000
263	00:00:10.341000
264	00:00:10.381000
265	00:00:10.420000
266	00:00:10.460000
267	00:00:10.499000
268	00:00:10.539000
269	00:00:10.578000
270	00:00:10.618000
271	00:00:10.658000
272	00:00:10.697000
273	00:00:10.737000
274	00:00:10.776000
275	00:00:10.815000
276	00:00:10.855000
277	00:00:10.895000
278	00:00:10.934000
279	00:00:10.974000
280	00:00:11.013000
281	00:00:11.053000
282	00:00:11.092000
283	00:00:11.132000
284	00:00:11.171000
285	00:00:11.211000
286	00:00:11.250000
287	00:00:11.290000
288	00:00:11.329000
289	00:00:11.369000
290	00:00:11.408000
291	00:00:11.448000
292	00:00:11.487000
293	00:00:11.527000
294	00:00:11.566000
295	00:00:11.606000
296	00:00:11.645000
297	00:00:11.685000
298	00:00:11.724000
299	00:00:11.764000
300	00:00:11.803000
301	00:00:11.843000
302	00:00:11.882000
303	00:00:11.922000
304	00:00:11.961000
305	00:00:12.001000
306	00:00:12.040000
307	00:00:12.080000
308	00:00:12.119000
309	00:00:12.159000
310	00:00:12.198000
311	00:00:12.238000
312	00:00:12.277000
313	00:00:12.317000
314	00:00:12.356000
315	00:00:12.396000
316	00:00:12.436000
317	00:00:12.475000
318	00:00:12.516000
319	00:00:12.555000
320	00:00:12.595000
321	00:00:12.634000
322	00:00:12.674000
323	00:00:12.713000
324	00:00:12.753000
325	00:00:12.792000
326	00:00:12.832000
327	00:00:12.871000
328	00:00:12.911000
329	00:00:12.950000
330	00:00:12.990000
331	00:00:13.029000
332	00:00:13.069000
333	00:00:13.108000
334	00:00:13.148000
335	00:00:13.187000
336	00:00:13.227000
337	00:00:13.266000
338	00:00:13.306000
339	00:00:13.345000
340	00:00:13.385000
341	00:00:13.424000
342	00:00:13.464000
343	00:00:13.503000
344	00:00:13.543000
345	00:00:13.582000
346	00:00:13.622000
347	00:00:13.661000
348	00:00:13.701000
349	00:00:13.740000
350	00:00:13.780000
351	00:00:13.819000
352	00:00:13.859000
353	00:00:13.898000
354	00:00:13.938000
355	00:00:13.978000
356	00:00:14.017000
357	00:00:14.057000
358	00:00:14.096000
359	00:00:14.136000
360	00:00:14.175000
361	00:00:14.215000
362	00:00:14.254000
363	00:00:14.294000
364	00:00:14.333000
365	00:00:14.373000
366	00:00:14.412000
367	00:00:14.452000
368	00:00:14.491000
369	00:00:14.531000
370	00:00:14.570000
371	00:00:14.610000
372	00:00:14.649000
373	00:00:14.689000
374	00:00:14.728000
375	00:00:14.768000
376	00:00:14.807000
377	00:00:14.847000
378	00:00:14.886000
379	00:00:14.926000
380	00:00:14.965000
381	00:00:15.005000
382	00:00:15.044000
383	00:00:15.084000
384	00:00:15.123000
385	00:00:15.163000
386	00:00:15.202000
387	00:00:15.242000
388	00:00:15.281000
389	00:00:15.321000
390	00:00:15.360000
391	00:00:15.400000
392	00:00:15.440000
393	00:00:15.479000
394	00:00:15.518000
395	00:00:15.558000
396	00:00:15.597000
397	00:00:15.637000
398	00:00:15.677000
399	00:00:15.716000
400	00:00:15.756000
401	00:00:15.795000
402	00:00:15.835000
403	00:00:15.874000
404	00:00:15.914000
405	00:00:15.953000
406	00:00:15.993000
407	00:00:16.032000
408	00:00:16.072000
409	00:00:16.111000
410	00:00:16.151000
411	00:00:16.190000
412	00:00:16.230000
413	00:00:16.269000
414	00:00:16.309000
415	00:00:16.348000
416	00:00:16.388000
417	00:00:16.427000
418	00:00:16.467000
419	00:00:16.506000
420	00:00:16.546000
421	00:00:16.585000
422	00:00:16.625000
423	00:00:16.664000
424	00:00:16.704000
425	00:00:16.743000
426	00:00:16.783000
427	00:00:16.822000
428	00:00:16.862000
429	00:00:16.901000
430	00:00:16.941000
431	00:00:16.980000
432	00:00:17.020000
433	00:00:17.059000
434	00:00:17.099000
435	00:00:17.138000
436	00:00:17.178000
437	00:00:17.217000
438	00:00:17.257000
439	00:00:17.297000
440	00:00:17.336000
441	00:00:17.376000
442	00:00:17.415000
443	00:00:17.455000
444	00:00:17.494000
445	00:00:17.535000
446	00:00:17.574000
447	00:00:17.614000
448	00:00:17.653000
449	00:00:17.693000
450	00:00:17.732000
451	00:00:17.772000
452	00:00:17.811000
453	00:00:17.851000
454	00:00:17.890000
455	00:00:17.930000
456	00:00:17.969000
457	00:00:18.009000
458	00:00:18.048000
459	00:00:18.088000
460	00:00:18.127000
461	00:00:18.167000
462	00:00:18.206000
463	00:00:18.246000
464	00:00:18.285000
465	00:00:18.325000
466	00:00:18.364000
467	00:00:18.404000
468	00:00:18.443000
469	00:00:18.483000
470	00:00:18.522000
471	00:00:18.562000
472	00:00:18.601000
473	00:00:18.641000
474	00:00:18.680000
475	00:00:18.720000
476	00:00:18.759000
477	00:00:18.799000
478	00:00:18.839000
479	00:00:18.878000
480	00:00:18.918000
481	00:00:18.957000
482	00:00:18.997000
483	00:00:19.036000
484	00:00:19.076000
485	00:00:19.115000
486	00:00:19.155000
487	00:00:19.194000
488	00:00:19.234000
489	00:00:19.273000
490	00:00:19.313000
491	00:00:19.352000
492	00:00:19.392000
493	00:00:19.431000
494	00:00:19.471000
495	00:00:19.510000
496	00:00:19.550000
497	00:00:19.589000
498	00:00:19.629000
499	00:00:19.668000
500	00:00:19.708000
501	00:00:19.747000
502	00:00:19.787000
503	00:00:19.826000
504	00:00:19.866000
505	00:00:19.905000
506	00:00:19.945000
507	00:00:19.984000
508	00:00:20.024000
509	00:00:20.063000
510	00:00:20.103000
511	00:00:20.142000
512	00:00:20.182000
513	00:00:20.221000
514	00:00:20.261000
515	00:00:20.301000
516	00:00:20.340000
517	00:00:20.380000
518	00:00:20.419000
519	00:00:20.458000
520	00:00:20.498000
521	00:00:20.537000
522	00:00:20.577000
523	00:00:20.617000
524	00:00:20.656000
525	00:00:20.696000
526	00:00:20.735000
527	00:00:20.775000
528	00:00:20.814000
529	00:00:20.854000
530	00:00:20.893000
531	00:00:20.933000
532	00:00:20.972000
533	00:00:21.012000
534	00:00:21.051000
535	00:00:21.091000
536	00:00:21.130000
537	00:00:21.170000
538	00:00:21.209000
539	00:00:21.249000
540	00:00:21.288000
541	00:00:21.328000
542	00:00:21.367000
543	00:00:21.407000
544	00:00:21.446000
545	00:00:21.486000
546	00:00:21.525000
547	00:00:21.565000
548	00:00:21.604000
549	00:00:21.644000
550	00:00:21.683000
551	00:00:21.723000
552	00:00:21.762000
553	00:00:21.802000
554	00:00:21.841000
555	00:00:21.881000
556	00:00:21.920000
557	00:00:21.960000
558	00:00:21.999000
559	00:00:22.039000
560	00:00:22.078000
561	00:00:22.118000
562	00:00:22.158000
563	00:00:22.197000
564	00:00:22.237000
565	00:00:22.276000
566	00:00:22.316000
567	00:00:22.355000
568	00:00:22.395000
569	00:00:22.434000
570	00:00:22.474000
571	00:00:22.514000
572	00:00:22.554000
573	00:00:22.593000
574	00:00:22.633000
575	00:00:22.672000
576	00:00:22.712000
577	00:00:22.751000
578	00:00:22.791000
579	00:00:22.830000
580	00:00:22.870000
581	00:00:22.909000
582	00:00:22.949000
583	00:00:22.988000
584	00:00:23.028000
585	00:00:23.067000
586	00:00:23.107000
587	00:00:23.146000
588	00:00:23.186000
589	00:00:23.225000
590	00:00:23.265000
591	00:00:23.304000

## Sheet: #3a
frame	time	PC	TB	ant isth	mid isth	post isth
1	00:00:00
2	00:00:00.031000
3	00:00:00.078000
4	00:00:00.109000
5	00:00:00.156000
6	00:00:00.187000
7	00:00:00.234000
8	00:00:00.265000
9	00:00:00.288000
10	00:00:00.328000
11	00:00:00.367000
12	00:00:00.407000
13	00:00:00.446000
14	00:00:00.486000
15	00:00:00.525000
16	00:00:00.565000
17	00:00:00.604000
18	00:00:00.644000
19	00:00:00.683000
20	00:00:00.723000
21	00:00:00.762000
22	00:00:00.802000
23	00:00:00.842000
24	00:00:00.881000
25	00:00:00.921000
26	00:00:00.960000
27	00:00:01
28	00:00:01.039000
29	00:00:01.079000
30	00:00:01.118000
31	00:00:01.158000
32	00:00:01.197000
33	00:00:01.237000
34	00:00:01.276000
35	00:00:01.316000
36	00:00:01.355000
37	00:00:01.395000
38	00:00:01.434000
39	00:00:01.474000
40	00:00:01.513000
41	00:00:01.553000
42	00:00:01.592000
43	00:00:01.633000
44	00:00:01.672000
45	00:00:01.712000
46	00:00:01.751000
47	00:00:01.791000
48	00:00:01.830000
49	00:00:01.870000
50	00:00:01.909000
51	00:00:01.949000
52	00:00:01.988000
53	00:00:02.028000
54	00:00:02.067000
55	00:00:02.107000
56	00:00:02.146000
57	00:00:02.186000
58	00:00:02.225000
59	00:00:02.265000
60	00:00:02.305000
61	00:00:02.344000
62	00:00:02.384000
63	00:00:02.423000
64	00:00:02.463000
65	00:00:02.502000
66	00:00:02.542000
67	00:00:02.581000
68	00:00:02.621000
69	00:00:02.660000
70	00:00:02.700000
71	00:00:02.739000
72	00:00:02.779000
73	00:00:02.818000
74	00:00:02.858000
75	00:00:02.897000
76	00:00:02.937000
77	00:00:02.976000
78	00:00:03.016000
79	00:00:03.055000
80	00:00:03.095000
81	00:00:03.134000
82	00:00:03.174000
83	00:00:03.213000
84	00:00:03.253000
85	00:00:03.292000
86	00:00:03.332000
87	00:00:03.371000
88	00:00:03.411000
89	00:00:03.450000
90	00:00:03.490000
91	00:00:03.529000
92	00:00:03.569000
93	00:00:03.608000
94	00:00:03.648000
95	00:00:03.687000
96	00:00:03.727000
97	00:00:03.766000
98	00:00:03.806000
99	00:00:03.845000
100	00:00:03.885000
101	00:00:03.925000
102	00:00:03.964000
103	00:00:04.003000
104	00:00:04.043000
105	00:00:04.082000
106	00:00:04.122000
107	00:00:04.162000
108	00:00:04.201000
109	00:00:04.241000
110	00:00:04.280000
111	00:00:04.320000
112	00:00:04.359000
113	00:00:04.399000
114	00:00:04.438000
115	00:00:04.478000
116	00:00:04.517000
117	00:00:04.557000
118	00:00:04.596000
119	00:00:04.636000
120	00:00:04.675000
121	00:00:04.715000
122	00:00:04.754000
123	00:00:04.794000
124	00:00:04.833000
125	00:00:04.873000
126	00:00:04.912000
127	00:00:04.952000
128	00:00:04.991000
129	00:00:05.031000
130	00:00:05.070000
131	00:00:05.110000
132	00:00:05.149000
133	00:00:05.189000
134	00:00:05.228000
135	00:00:05.268000
136	00:00:05.307000
137	00:00:05.347000
138	00:00:05.386000
139	00:00:05.426000
140	00:00:05.465000
141	00:00:05.505000
142	00:00:05.544000
143	00:00:05.584000
144	00:00:05.624000
145	00:00:05.663000
146	00:00:05.703000
147	00:00:05.742000
148	00:00:05.782000
149	00:00:05.821000
150	00:00:05.861000
151	00:00:05.900000
152	00:00:05.940000
153	00:00:05.979000
154	00:00:06.019000
155	00:00:06.058000
156	00:00:06.098000
157	00:00:06.137000
158	00:00:06.177000
159	00:00:06.216000
160	00:00:06.256000
161	00:00:06.295000
162	00:00:06.335000
163	00:00:06.374000
164	00:00:06.414000
165	00:00:06.453000
166	00:00:06.493000
167	00:00:06.532000
168	00:00:06.572000
169	00:00:06.611000
170	00:00:06.652000
171	00:00:06.691000
172	00:00:06.731000
173	00:00:06.770000
174	00:00:06.810000
175	00:00:06.849000
176	00:00:06.889000
177	00:00:06.928000
178	00:00:06.968000
179	00:00:07.007000
180	00:00:07.047000
181	00:00:07.086000
182	00:00:07.126000
183	00:00:07.166000
184	00:00:07.205000
185	00:00:07.245000
186	00:00:07.284000
187	00:00:07.324000
188	00:00:07.363000
189	00:00:07.403000
190	00:00:07.442000
191	00:00:07.482000
192	00:00:07.521000
193	00:00:07.561000
194	00:00:07.600000
195	00:00:07.640000
196	00:00:07.679000
197	00:00:07.719000
198	00:00:07.758000
199	00:00:07.798000
200	00:00:07.837000
201	00:00:07.877000
202	00:00:07.916000
203	00:00:07.956000
204	00:00:07.995000
205	00:00:08.035000
206	00:00:08.074000
207	00:00:08.114000
208	00:00:08.153000
209	00:00:08.193000
210	00:00:08.232000
211	00:00:08.272000
212	00:00:08.311000
213	00:00:08.351000
214	00:00:08.390000
215	00:00:08.430000
216	00:00:08.469000
217	00:00:08.509000
218	00:00:08.548000
219	00:00:08.588000
220	00:00:08.627000
221	00:00:08.667000
222	00:00:08.707000
223	00:00:08.746000
224	00:00:08.785000
225	00:00:08.825000
226	00:00:08.864000
227	00:00:08.904000
228	00:00:08.943000
229	00:00:08.983000
230	00:00:09.023000
231	00:00:09.062000
232	00:00:09.102000
233	00:00:09.141000
234	00:00:09.181000
235	00:00:09.220000
236	00:00:09.260000
237	00:00:09.299000
238	00:00:09.339000
239	00:00:09.378000
240	00:00:09.418000
241	00:00:09.457000
242	00:00:09.497000
243	00:00:09.536000
244	00:00:09.576000
245	00:00:09.615000
246	00:00:09.655000
247	00:00:09.694000
248	00:00:09.734000
249	00:00:09.773000
250	00:00:09.813000
251	00:00:09.852000
252	00:00:09.892000
253	00:00:09.931000
254	00:00:09.971000
255	00:00:10.010000
256	00:00:10.050000
257	00:00:10.089000
258	00:00:10.129000
259	00:00:10.168000
260	00:00:10.208000
261	00:00:10.247000
262	00:00:10.287000
263	00:00:10.326000
264	00:00:10.366000
265	00:00:10.405000
266	00:00:10.445000
267	00:00:10.485000
268	00:00:10.524000
269	00:00:10.564000
270	00:00:10.603000
271	00:00:10.643000
272	00:00:10.682000
273	00:00:10.722000
274	00:00:10.761000
275	00:00:10.801000
276	00:00:10.840000
277	00:00:10.880000
278	00:00:10.919000
279	00:00:10.959000
280	00:00:10.998000
281	00:00:11.038000
282	00:00:11.077000
283	00:00:11.117000
284	00:00:11.156000
285	00:00:11.196000
286	00:00:11.235000
287	00:00:11.275000
288	00:00:11.314000
289	00:00:11.354000
290	00:00:11.393000
291	00:00:11.433000
292	00:00:11.472000
293	00:00:11.512000
294	00:00:11.551000
295	00:00:11.591000
296	00:00:11.631000
297	00:00:11.671000
298	00:00:11.710000
299	00:00:11.750000
300	00:00:11.789000
301	00:00:11.829000
302	00:00:11.868000
303	00:00:11.908000
304	00:00:11.947000
305	00:00:11.987000
306	00:00:12.027000
307	00:00:12.066000
308	00:00:12.106000
309	00:00:12.145000
310	00:00:12.185000
311	00:00:12.224000
312	00:00:12.264000
313	00:00:12.303000
314	00:00:12.343000
315	00:00:12.382000
316	00:00:12.422000
317	00:00:12.461000
318	00:00:12.501000
319	00:00:12.540000
320	00:00:12.580000
321	00:00:12.619000
322	00:00:12.659000
323	00:00:12.698000
324	00:00:12.738000
325	00:00:12.777000
326	00:00:12.817000
327	00:00:12.856000
328	00:00:12.896000
329	00:00:12.935000
330	00:00:12.975000
331	00:00:13.014000
332	00:00:13.054000
333	00:00:13.093000
334	00:00:13.133000
335	00:00:13.172000
336	00:00:13.212000
337	00:00:13.251000
338	00:00:13.291000
339	00:00:13.330000
340	00:00:13.370000
341	00:00:13.409000
342	00:00:13.449000
343	00:00:13.488000
344	00:00:13.528000
345	00:00:13.568000
346	00:00:13.607000
347	00:00:13.646000
348	00:00:13.686000
349	00:00:13.725000
350	00:00:13.765000
351	00:00:13.805000
352	00:00:13.844000
353	00:00:13.884000
354	00:00:13.923000
355	00:00:13.963000
356	00:00:14.002000
357	00:00:14.042000
358	00:00:14.081000
359	00:00:14.121000
360	00:00:14.160000
361	00:00:14.200000
362	00:00:14.239000
363	00:00:14.279000
364	00:00:14.318000
365	00:00:14.358000
366	00:00:14.397000
367	00:00:14.437000
368	00:00:14.476000
369	00:00:14.516000
370	00:00:14.555000
371	00:00:14.595000
372	00:00:14.634000
373	00:00:14.674000
374	00:00:14.713000
375	00:00:14.753000
376	00:00:14.792000
377	00:00:14.832000
378	00:00:14.871000
379	00:00:14.911000
380	00:00:14.950000
381	00:00:14.990000
382	00:00:15.029000
383	00:00:15.069000
384	00:00:15.108000
385	00:00:15.148000
386	00:00:15.187000
387	00:00:15.227000
388	00:00:15.266000
389	00:00:15.306000
390	00:00:15.346000
391	00:00:15.385000
392	00:00:15.425000
393	00:00:15.464000
394	00:00:15.504000
395	00:00:15.543000
396	00:00:15.583000
397	00:00:15.622000
398	00:00:15.662000
399	00:00:15.701000
400	00:00:15.741000
401	00:00:15.780000
402	00:00:15.820000
403	00:00:15.859000
404	00:00:15.899000
405	00:00:15.938000
406	00:00:15.978000
407	00:00:16.017000
408	00:00:16.057000
409	00:00:16.096000
410	00:00:16.136000
411	00:00:16.175000
412	00:00:16.215000
413	00:00:16.254000
414	00:00:16.294000
415	00:00:16.333000
416	00:00:16.373000
417	00:00:16.412000
418	00:00:16.452000
419	00:00:16.491000
420	00:00:16.531000
421	00:00:16.570000
422	00:00:16.610000
423	00:00:16.650000
424	00:00:16.690000
425	00:00:16.729000
426	00:00:16.769000
427	00:00:16.808000
428	00:00:16.848000
429	00:00:16.888000
430	00:00:16.927000
431	00:00:16.967000
432	00:00:17.006000
433	00:00:17.046000
434	00:00:17.085000
435	00:00:17.125000
436	00:00:17.164000
437	00:00:17.204000
438	00:00:17.243000
439	00:00:17.283000
440	00:00:17.322000
441	00:00:17.362000
442	00:00:17.401000
443	00:00:17.441000
444	00:00:17.480000
445	00:00:17.520000
446	00:00:17.559000
447	00:00:17.599000
448	00:00:17.638000
449	00:00:17.678000
450	00:00:17.717000
451	00:00:17.757000
452	00:00:17.796000
453	00:00:17.836000
454	00:00:17.875000
455	00:00:17.915000
456	00:00:17.954000
457	00:00:17.994000
458	00:00:18.033000
459	00:00:18.073000
460	00:00:18.112000
461	00:00:18.152000
462	00:00:18.191000
463	00:00:18.231000
464	00:00:18.276000
465	00:00:18.310000
466	00:00:18.350000
467	00:00:18.389000
468	00:00:18.429000
469	00:00:18.468000
470	00:00:18.507000
471	00:00:18.547000
472	00:00:18.586000
473	00:00:18.626000
474	00:00:18.666000
475	00:00:18.705000
476	00:00:18.745000
477	00:00:18.784000
478	00:00:18.824000
479	00:00:18.863000
480	00:00:18.903000
481	00:00:18.942000
482	00:00:18.982000
483	00:00:19.021000
484	00:00:19.061000
485	00:00:19.100000
486	00:00:19.140000
487	00:00:19.179000
488	00:00:19.219000
489	00:00:19.258000
490	00:00:19.298000
491	00:00:19.337000
492	00:00:19.377000
493	00:00:19.416000
494	00:00:19.456000
495	00:00:19.495000
496	00:00:19.535000
497	00:00:19.574000
498	00:00:19.614000
499	00:00:19.653000
500	00:00:19.693000
501	00:00:19.732000
502	00:00:19.772000
503	00:00:19.811000
504	00:00:19.851000
505	00:00:19.890000
506	00:00:19.930000
507	00:00:19.969000
508	00:00:20.009000
509	00:00:20.048000
510	00:00:20.088000
511	00:00:20.127000
512	00:00:20.167000
513	00:00:20.207000
514	00:00:20.246000
515	00:00:20.286000
516	00:00:20.325000
517	00:00:20.365000
518	00:00:20.404000
519	00:00:20.444000
520	00:00:20.483000
521	00:00:20.523000
522	00:00:20.562000
523	00:00:20.602000
524	00:00:20.641000
525	00:00:20.681000
526	00:00:20.720000
527	00:00:20.760000
528	00:00:20.799000
529	00:00:20.839000
530	00:00:20.878000
531	00:00:20.918000
532	00:00:20.957000
533	00:00:20.997000
534	00:00:21.036000
535	00:00:21.076000
536	00:00:21.115000
537	00:00:21.155000
538	00:00:21.194000
539	00:00:21.234000
540	00:00:21.273000
541	00:00:21.313000
542	00:00:21.352000
543	00:00:21.392000
544	00:00:21.431000
545	00:00:21.471000
546	00:00:21.510000
547	00:00:21.550000
548	00:00:21.589000
549	00:00:21.630000
550	00:00:21.669000
551	00:00:21.709000
552	00:00:21.749000
553	00:00:21.788000
554	00:00:21.828000
555	00:00:21.867000
556	00:00:21.907000
557	00:00:21.946000
558	00:00:21.986000
559	00:00:22.025000
560	00:00:22.065000
561	00:00:22.104000
562	00:00:22.144000
563	00:00:22.183000
564	00:00:22.223000
565	00:00:22.262000
566	00:00:22.302000
567	00:00:22.341000
568	00:00:22.381000
569	00:00:22.420000
570	00:00:22.460000
571	00:00:22.499000
572	00:00:22.539000
573	00:00:22.578000
574	00:00:22.618000
575	00:00:22.657000
576	00:00:22.697000
577	00:00:22.736000
578	00:00:22.776000
579	00:00:22.815000
580	00:00:22.855000
581	00:00:22.894000
582	00:00:22.934000
583	00:00:22.973000
584	00:00:23.013000
585	00:00:23.052000
586	00:00:23.092000
587	00:00:23.131000
588	00:00:23.171000
589	00:00:23.211000
590	00:00:23.250000
591	00:00:23.290000
592	00:00:23.329000
593	00:00:23.368000
594	00:00:23.408000
595	00:00:23.447000
596	00:00:23.487000
597	00:00:23.527000
598	00:00:23.566000
599	00:00:23.606000
600	00:00:23.645000
601	00:00:23.685000
602	00:00:23.724000
603	00:00:23.764000
604	00:00:23.803000
605	00:00:23.843000
606	00:00:23.882000
607	00:00:23.922000
608	00:00:23.961000
609	00:00:24.001000
610	00:00:24.040000
611	00:00:24.080000
612	00:00:24.119000
613	00:00:24.159000
614	00:00:24.198000
615	00:00:24.238000
616	00:00:24.277000
617	00:00:24.317000
618	00:00:24.356000
619	00:00:24.396000
620	00:00:24.435000
621	00:00:24.475000
622	00:00:24.514000
623	00:00:24.554000
624	00:00:24.593000
625	00:00:24.633000
626	00:00:24.672000
627	00:00:24.712000
628	00:00:24.751000
629	00:00:24.791000
630	00:00:24.830000
631	00:00:24.870000
632	00:00:24.909000
633	00:00:24.949000
634	00:00:24.988000
635	00:00:25.028000
636	00:00:25.068000
637	00:00:25.107000
638	00:00:25.147000
639	00:00:25.186000
640	00:00:25.226000
641	00:00:25.265000
642	00:00:25.305000
643	00:00:25.344000
644	00:00:25.384000
645	00:00:25.423000
646	00:00:25.463000
647	00:00:25.502000
648	00:00:25.542000
649	00:00:25.581000
650	00:00:25.621000
651	00:00:25.660000
652	00:00:25.700000
653	00:00:25.739000
654	00:00:25.779000
655	00:00:25.818000
656	00:00:25.858000
657	00:00:25.897000
658	00:00:25.937000
659	00:00:25.976000
660	00:00:26.016000
661	00:00:26.055000
662	00:00:26.095000
663	00:00:26.134000
664	00:00:26.174000
665	00:00:26.213000
666	00:00:26.253000
667	00:00:26.292000
668	00:00:26.332000
669	00:00:26.371000
670	00:00:26.411000
671	00:00:26.450000
672	00:00:26.490000
673	00:00:26.530000
674	00:00:26.569000
675	00:00:26.609000
676	00:00:26.649000
677	00:00:26.689000
678	00:00:26.728000
679	00:00:26.768000
680	00:00:26.807000
681	00:00:26.847000
682	00:00:26.886000
683	00:00:26.926000
684	00:00:26.965000
685	00:00:27.005000
686	00:00:27.044000
687	00:00:27.084000
688	00:00:27.123000
689	00:00:27.163000
690	00:00:27.202000
691	00:00:27.242000
692	00:00:27.281000
693	00:00:27.321000
694	00:00:27.360000
695	00:00:27.400000
696	00:00:27.439000
697	00:00:27.479000
698	00:00:27.518000

## Sheet: #4a
frame	time	PC	TB	ant isth	mid isth	post isth
1	00:00:00
2	00:00:00.040000
3	00:00:00.079000
4	00:00:00.146000
5	00:00:00.178000
6	00:00:00.224000
7	00:00:00.256000
8	00:00:00.302000
9	00:00:00.334000
10	00:00:00.380000
11	00:00:00.412000
12	00:00:00.458000
13	00:00:00.490000
14	00:00:00.536000
15	00:00:00.568000
16	00:00:00.593000
17	00:00:00.632000
18	00:00:00.672000
19	00:00:00.711000
20	00:00:00.751000
21	00:00:00.790000
22	00:00:00.830000
23	00:00:00.869000
24	00:00:00.909000
25	00:00:00.948000
26	00:00:00.988000
27	00:00:01.027000
28	00:00:01.067000
29	00:00:01.106000
30	00:00:01.146000
31	00:00:01.185000
32	00:00:01.225000
33	00:00:01.264000
34	00:00:01.304000
35	00:00:01.343000
36	00:00:01.383000
37	00:00:01.422000
38	00:00:01.462000
39	00:00:01.501000
40	00:00:01.541000
41	00:00:01.580000
42	00:00:01.620000
43	00:00:01.659000
44	00:00:01.699000
45	00:00:01.739000
46	00:00:01.779000
47	00:00:01.818000
48	00:00:01.858000
49	00:00:01.897000
50	00:00:01.937000
51	00:00:01.977000
52	00:00:02.016000
53	00:00:02.055000
54	00:00:02.095000
55	00:00:02.135000
56	00:00:02.174000
57	00:00:02.214000
58	00:00:02.253000
59	00:00:02.293000
60	00:00:02.332000
61	00:00:02.372000
62	00:00:02.411000
63	00:00:02.451000
64	00:00:02.490000
65	00:00:02.530000
66	00:00:02.569000
67	00:00:02.609000
68	00:00:02.648000
69	00:00:02.688000
70	00:00:02.727000
71	00:00:02.767000
72	00:00:02.806000
73	00:00:02.846000
74	00:00:02.885000
75	00:00:02.925000
76	00:00:02.964000
77	00:00:03.004000
78	00:00:03.043000
79	00:00:03.083000
80	00:00:03.122000
81	00:00:03.162000
82	00:00:03.201000
83	00:00:03.241000
84	00:00:03.280000
85	00:00:03.320000
86	00:00:03.359000
87	00:00:03.399000
88	00:00:03.438000
89	00:00:03.478000
90	00:00:03.517000
91	00:00:03.557000
92	00:00:03.596000
93	00:00:03.636000
94	00:00:03.676000
95	00:00:03.715000
96	00:00:03.755000
97	00:00:03.794000
98	00:00:03.834000
99	00:00:03.873000
100	00:00:03.913000
101	00:00:03.952000
102	00:00:03.992000
103	00:00:04.031000
104	00:00:04.071000
105	00:00:04.110000
106	00:00:04.150000
107	00:00:04.189000
108	00:00:04.229000
109	00:00:04.268000
110	00:00:04.308000
111	00:00:04.347000
112	00:00:04.387000
113	00:00:04.426000
114	00:00:04.466000
115	00:00:04.505000
116	00:00:04.545000
117	00:00:04.584000
118	00:00:04.624000
119	00:00:04.663000
120	00:00:04.703000
121	00:00:04.742000
122	00:00:04.782000
123	00:00:04.821000
124	00:00:04.861000
125	00:00:04.900000
126	00:00:04.940000
127	00:00:04.979000
128	00:00:05.019000
129	00:00:05.058000
130	00:00:05.098000
131	00:00:05.137000
132	00:00:05.177000
133	00:00:05.217000
134	00:00:05.256000
135	00:00:05.296000
136	00:00:05.335000
137	00:00:05.375000
138	00:00:05.414000
139	00:00:05.454000
140	00:00:05.493000
141	00:00:05.533000
142	00:00:05.572000
143	00:00:05.612000
144	00:00:05.651000
145	00:00:05.691000
146	00:00:05.730000
147	00:00:05.770000
148	00:00:05.809000
149	00:00:05.849000
150	00:00:05.888000
151	00:00:05.928000
152	00:00:05.967000
153	00:00:06.007000
154	00:00:06.046000
155	00:00:06.086000
156	00:00:06.125000
157	00:00:06.165000
158	00:00:06.204000
159	00:00:06.244000
160	00:00:06.283000
161	00:00:06.323000
162	00:00:06.362000
163	00:00:06.402000
164	00:00:06.441000
165	00:00:06.481000
166	00:00:06.520000
167	00:00:06.560000
168	00:00:06.599000
169	00:00:06.639000
170	00:00:06.679000
171	00:00:06.719000
172	00:00:06.758000
173	00:00:06.798000
174	00:00:06.837000
175	00:00:06.877000
176	00:00:06.916000
177	00:00:06.956000
178	00:00:06.996000
179	00:00:07.035000
180	00:00:07.075000
181	00:00:07.114000
182	00:00:07.154000
183	00:00:07.193000
184	00:00:07.233000
185	00:00:07.272000
186	00:00:07.312000
187	00:00:07.351000
188	00:00:07.391000
189	00:00:07.430000
190	00:00:07.470000
191	00:00:07.509000
192	00:00:07.549000
193	00:00:07.588000
194	00:00:07.628000
195	00:00:07.667000
196	00:00:07.707000
197	00:00:07.746000
198	00:00:07.786000
199	00:00:07.825000
200	00:00:07.865000
201	00:00:07.904000
202	00:00:07.944000
203	00:00:07.983000
204	00:00:08.023000
205	00:00:08.062000
206	00:00:08.102000
207	00:00:08.141000
208	00:00:08.181000
209	00:00:08.220000
210	00:00:08.260000
211	00:00:08.299000
212	00:00:08.339000
213	00:00:08.378000
214	00:00:08.418000
215	00:00:08.457000
216	00:00:08.497000
217	00:00:08.537000
218	00:00:08.576000
219	00:00:08.616000
220	00:00:08.655000
221	00:00:08.695000
222	00:00:08.734000
223	00:00:08.774000
224	00:00:08.813000
225	00:00:08.853000
226	00:00:08.892000
227	00:00:08.932000
228	00:00:08.971000
229	00:00:09.011000
230	00:00:09.050000
231	00:00:09.090000
232	00:00:09.129000
233	00:00:09.169000
234	00:00:09.208000
235	00:00:09.248000
236	00:00:09.287000
237	00:00:09.327000
238	00:00:09.366000
239	00:00:09.406000
240	00:00:09.445000
241	00:00:09.485000
242	00:00:09.524000
243	00:00:09.564000
244	00:00:09.603000
245	00:00:09.643000
246	00:00:09.682000
247	00:00:09.722000
248	00:00:09.761000
249	00:00:09.801000
250	00:00:09.840000
251	00:00:09.880000
252	00:00:09.919000
253	00:00:09.959000
254	00:00:09.998000
255	00:00:10.038000
256	00:00:10.078000
257	00:00:10.117000
258	00:00:10.157000
259	00:00:10.196000
260	00:00:10.236000
261	00:00:10.275000
262	00:00:10.315000
263	00:00:10.354000
264	00:00:10.394000
265	00:00:10.433000
266	00:00:10.473000
267	00:00:10.512000
268	00:00:10.552000
269	00:00:10.591000
270	00:00:10.631000
271	00:00:10.670000
272	00:00:10.710000
273	00:00:10.749000
274	00:00:10.789000
275	00:00:10.828000
276	00:00:10.868000
277	00:00:10.907000
278	00:00:10.947000
279	00:00:10.986000
280	00:00:11.026000
281	00:00:11.065000
282	00:00:11.105000
283	00:00:11.144000
284	00:00:11.184000
285	00:00:11.223000
286	00:00:11.263000
287	00:00:11.302000
288	00:00:11.342000
289	00:00:11.381000
290	00:00:11.421000
291	00:00:11.460000
292	00:00:11.500000
293	00:00:11.540000
294	00:00:11.579000
295	00:00:11.619000
296	00:00:11.658000
297	00:00:11.697000
298	00:00:11.737000
299	00:00:11.776000
300	00:00:11.816000
301	00:00:11.856000
302	00:00:11.895000
303	00:00:11.935000
304	00:00:11.974000
305	00:00:12.014000
306	00:00:12.053000
307	00:00:12.093000
308	00:00:12.133000
309	00:00:12.173000
310	00:00:12.212000
311	00:00:12.252000
312	00:00:12.291000
313	00:00:12.331000
314	00:00:12.370000
315	00:00:12.410000
316	00:00:12.449000
317	00:00:12.489000
318	00:00:12.528000
319	00:00:12.568000
320	00:00:12.607000
321	00:00:12.647000
322	00:00:12.686000
323	00:00:12.726000
324	00:00:12.765000
325	00:00:12.805000
326	00:00:12.844000
327	00:00:12.884000
328	00:00:12.923000
329	00:00:12.963000
330	00:00:13.002000
331	00:00:13.042000
332	00:00:13.081000
333	00:00:13.121000
334	00:00:13.160000
335	00:00:13.200000
336	00:00:13.239000
337	00:00:13.279000
338	00:00:13.318000
339	00:00:13.358000
340	00:00:13.398000
341	00:00:13.437000
342	00:00:13.477000
343	00:00:13.516000
344	00:00:13.556000
345	00:00:13.595000
346	00:00:13.635000
347	00:00:13.674000
348	00:00:13.714000
349	00:00:13.753000
350	00:00:13.793000
351	00:00:13.832000
352	00:00:13.872000
353	00:00:13.911000
354	00:00:13.951000
355	00:00:13.990000
356	00:00:14.030000
357	00:00:14.069000
358	00:00:14.109000
359	00:00:14.148000
360	00:00:14.188000
361	00:00:14.227000
362	00:00:14.267000
363	00:00:14.306000
364	00:00:14.346000
365	00:00:14.385000
366	00:00:14.425000
367	00:00:14.464000
368	00:00:14.504000
369	00:00:14.543000
370	00:00:14.583000
371	00:00:14.622000
372	00:00:14.662000
373	00:00:14.701000
374	00:00:14.741000
375	00:00:14.780000
376	00:00:14.820000
377	00:00:14.860000
378	00:00:14.899000
379	00:00:14.939000
380	00:00:14.978000
381	00:00:15.018000
382	00:00:15.057000
383	00:00:15.097000
384	00:00:15.136000
385	00:00:15.176000
386	00:00:15.215000
387	00:00:15.255000
388	00:00:15.294000
389	00:00:15.334000
390	00:00:15.373000
391	00:00:15.413000
392	00:00:15.452000
393	00:00:15.492000
394	00:00:15.531000
395	00:00:15.571000
396	00:00:15.610000
397	00:00:15.650000
398	00:00:15.689000
399	00:00:15.729000
400	00:00:15.768000
401	00:00:15.808000
402	00:00:15.847000
403	00:00:15.887000
404	00:00:15.926000
405	00:00:15.966000
406	00:00:16.005000
407	00:00:16.045000
408	00:00:16.084000
409	00:00:16.124000
410	00:00:16.163000
411	00:00:16.203000
412	00:00:16.242000
413	00:00:16.282000
414	00:00:16.321000
415	00:00:16.361000
416	00:00:16.401000
417	00:00:16.440000
418	00:00:16.479000
419	00:00:16.519000
420	00:00:16.558000
421	00:00:16.598000
422	00:00:16.637000
423	00:00:16.677000
424	00:00:16.717000
425	00:00:16.756000
426	00:00:16.796000
427	00:00:16.835000
428	00:00:16.875000
429	00:00:16.914000
430	00:00:16.954000
431	00:00:16.993000
432	00:00:17.033000
433	00:00:17.072000
434	00:00:17.112000
435	00:00:17.151000
436	00:00:17.191000
437	00:00:17.230000
438	00:00:17.270000
439	00:00:17.309000
440	00:00:17.349000
441	00:00:17.388000
442	00:00:17.428000
443	00:00:17.467000
444	00:00:17.507000
445	00:00:17.546000
446	00:00:17.586000
447	00:00:17.625000
448	00:00:17.665000
449	00:00:17.704000
450	00:00:17.744000
451	00:00:17.783000
452	00:00:17.823000
453	00:00:17.862000
454	00:00:17.902000
455	00:00:17.941000
456	00:00:17.981000
457	00:00:18.020000
458	00:00:18.060000
459	00:00:18.099000
460	00:00:18.139000
461	00:00:18.178000
462	00:00:18.218000
463	00:00:18.258000
464	00:00:18.297000
465	00:00:18.337000
466	00:00:18.376000
467	00:00:18.416000
468	00:00:18.455000
469	00:00:18.495000
470	00:00:18.534000
471	00:00:18.574000
472	00:00:18.613000
473	00:00:18.653000
474	00:00:18.692000
475	00:00:18.732000
476	00:00:18.771000
477	00:00:18.811000
478	00:00:18.850000
479	00:00:18.890000
480	00:00:18.929000
481	00:00:18.969000
482	00:00:19.008000
483	00:00:19.048000
484	00:00:19.087000
485	00:00:19.127000
486	00:00:19.166000
487	00:00:19.206000
488	00:00:19.245000
489	00:00:19.285000
490	00:00:19.324000
491	00:00:19.364000
492	00:00:19.403000
493	00:00:19.443000
494	00:00:19.482000
495	00:00:19.522000
496	00:00:19.561000
497	00:00:19.601000
498	00:00:19.640000
499	00:00:19.680000
500	00:00:19.720000
501	00:00:19.759000
502	00:00:19.799000
503	00:00:19.838000
504	00:00:19.878000
505	00:00:19.917000
506	00:00:19.957000
507	00:00:19.996000
508	00:00:20.036000
509	00:00:20.075000
510	00:00:20.115000
511	00:00:20.154000
512	00:00:20.194000
513	00:00:20.233000
514	00:00:20.273000
515	00:00:20.312000
516	00:00:20.352000
517	00:00:20.391000
518	00:00:20.431000
519	00:00:20.470000
520	00:00:20.510000
521	00:00:20.549000
522	00:00:20.589000
523	00:00:20.628000
524	00:00:20.668000
525	00:00:20.707000
526	00:00:20.747000
527	00:00:20.786000
528	00:00:20.826000
529	00:00:20.865000
530	00:00:20.905000
531	00:00:20.944000
532	00:00:20.984000
533	00:00:21.023000
534	00:00:21.063000
535	00:00:21.102000
536	00:00:21.142000
537	00:00:21.181000
538	00:00:21.221000
539	00:00:21.261000
540	00:00:21.300000
541	00:00:21.340000
542	00:00:21.379000
543	00:00:21.418000
544	00:00:21.458000
545	00:00:21.497000
546	00:00:21.537000
547	00:00:21.577000
548	00:00:21.616000
549	00:00:21.656000
550	00:00:21.695000
551	00:00:21.735000
552	00:00:21.774000
553	00:00:21.814000
554	00:00:21.853000
555	00:00:21.893000
556	00:00:21.932000
557	00:00:21.972000
558	00:00:22.011000
559	00:00:22.051000
560	00:00:22.090000

## Sheet: #5a
frame	time	PC	TB	ant isth	mid isth	post isth
1	00:00:00
2	00:00:00.040000
3	00:00:00.079000
4	00:00:00.119000
5	00:00:00.158000
6	00:00:00.198000
7	00:00:00.237000
8	00:00:00.277000
9	00:00:00.316000
10	00:00:00.356000
11	00:00:00.395000
12	00:00:00.435000
13	00:00:00.474000
14	00:00:00.514000
15	00:00:00.553000
16	00:00:00.593000
17	00:00:00.632000
18	00:00:00.672000
19	00:00:00.711000
20	00:00:00.751000
21	00:00:00.790000
22	00:00:00.830000
23	00:00:00.869000
24	00:00:00.909000
25	00:00:00.948000
26	00:00:00.988000
27	00:00:01.027000
28	00:00:01.067000
29	00:00:01.106000
30	00:00:01.146000
31	00:00:01.185000
32	00:00:01.225000
33	00:00:01.265000
34	00:00:01.304000
35	00:00:01.344000
36	00:00:01.383000
37	00:00:01.423000
38	00:00:01.462000
39	00:00:01.502000
40	00:00:01.541000
41	00:00:01.581000
42	00:00:01.620000
43	00:00:01.660000
44	00:00:01.699000
45	00:00:01.739000
46	00:00:01.778000
47	00:00:01.818000
48	00:00:01.857000
49	00:00:01.897000
50	00:00:01.936000
51	00:00:01.976000
52	00:00:02.015000
53	00:00:02.055000
54	00:00:02.094000
55	00:00:02.134000
56	00:00:02.173000
57	00:00:02.213000
58	00:00:02.252000
59	00:00:02.292000
60	00:00:02.331000
61	00:00:02.371000
62	00:00:02.410000
63	00:00:02.450000
64	00:00:02.489000
65	00:00:02.529000
66	00:00:02.568000
67	00:00:02.608000
68	00:00:02.647000
69	00:00:02.687000
70	00:00:02.726000
71	00:00:02.766000
72	00:00:02.806000
73	00:00:02.845000
74	00:00:02.885000
75	00:00:02.924000
76	00:00:02.964000
77	00:00:03.003000
78	00:00:03.043000
79	00:00:03.082000
80	00:00:03.122000
81	00:00:03.161000
82	00:00:03.201000
83	00:00:03.240000
84	00:00:03.280000
85	00:00:03.319000
86	00:00:03.359000
87	00:00:03.398000
88	00:00:03.438000
89	00:00:03.477000
90	00:00:03.517000
91	00:00:03.556000
92	00:00:03.596000
93	00:00:03.635000
94	00:00:03.675000
95	00:00:03.714000
96	00:00:03.754000
97	00:00:03.793000
98	00:00:03.833000
99	00:00:03.872000
100	00:00:03.912000
101	00:00:03.951000
102	00:00:03.991000
103	00:00:04.030000
104	00:00:04.070000
105	00:00:04.109000
106	00:00:04.149000
107	00:00:04.188000
108	00:00:04.228000
109	00:00:04.267000
110	00:00:04.307000
111	00:00:04.346000
112	00:00:04.386000
113	00:00:04.426000
114	00:00:04.465000
115	00:00:04.504000
116	00:00:04.544000
117	00:00:04.584000
118	00:00:04.623000
119	00:00:04.663000
120	00:00:04.702000
121	00:00:04.742000
122	00:00:04.781000
123	00:00:04.821000
124	00:00:04.860000
125	00:00:04.900000
126	00:00:04.939000
127	00:00:04.979000
128	00:00:05.019000
129	00:00:05.059000
130	00:00:05.098000
131	00:00:05.138000
132	00:00:05.177000
133	00:00:05.217000
134	00:00:05.256000
135	00:00:05.296000
136	00:00:05.335000
137	00:00:05.375000
138	00:00:05.414000
139	00:00:05.454000
140	00:00:05.493000
141	00:00:05.533000
142	00:00:05.572000
143	00:00:05.612000
144	00:00:05.651000
145	00:00:05.691000
146	00:00:05.730000
147	00:00:05.770000
148	00:00:05.809000
149	00:00:05.849000
150	00:00:05.888000
151	00:00:05.928000
152	00:00:05.967000
153	00:00:06.007000
154	00:00:06.046000
155	00:00:06.086000
156	00:00:06.126000
157	00:00:06.165000
158	00:00:06.205000
159	00:00:06.244000
160	00:00:06.284000
161	00:00:06.323000
162	00:00:06.363000
163	00:00:06.402000
164	00:00:06.442000
165	00:00:06.481000
166	00:00:06.521000
167	00:00:06.560000
168	00:00:06.600000
169	00:00:06.639000
170	00:00:06.679000
171	00:00:06.718000
172	00:00:06.758000
173	00:00:06.797000
174	00:00:06.837000
175	00:00:06.876000
176	00:00:06.916000
177	00:00:06.955000
178	00:00:06.995000
179	00:00:07.034000
180	00:00:07.074000
181	00:00:07.113000
182	00:00:07.153000
183	00:00:07.192000
184	00:00:07.232000
185	00:00:07.271000
186	00:00:07.311000
187	00:00:07.350000
188	00:00:07.390000
189	00:00:07.429000
190	00:00:07.469000
191	00:00:07.508000
192	00:00:07.548000
193	00:00:07.587000
194	00:00:07.627000
195	00:00:07.667000
196	00:00:07.706000
197	00:00:07.746000
198	00:00:07.785000
199	00:00:07.825000
200	00:00:07.864000
201	00:00:07.904000
202	00:00:07.943000
203	00:00:07.983000
204	00:00:08.022000
205	00:00:08.062000
206	00:00:08.101000
207	00:00:08.141000
208	00:00:08.180000
209	00:00:08.220000
210	00:00:08.259000
211	00:00:08.299000
212	00:00:08.338000
213	00:00:08.378000
214	00:00:08.417000
215	00:00:08.457000
216	00:00:08.496000
217	00:00:08.536000
218	00:00:08.575000
219	00:00:08.615000
220	00:00:08.654000
221	00:00:08.694000
222	00:00:08.733000
223	00:00:08.773000
224	00:00:08.812000
225	00:00:08.852000
226	00:00:08.891000
227	00:00:08.931000
228	00:00:08.970000
229	00:00:09.010000
230	00:00:09.049000
231	00:00:09.089000
232	00:00:09.129000
233	00:00:09.168000
234	00:00:09.207000
235	00:00:09.247000
236	00:00:09.287000
237	00:00:09.326000
238	00:00:09.365000
239	00:00:09.405000
240	00:00:09.445000
241	00:00:09.484000
242	00:00:09.524000
243	00:00:09.563000
244	00:00:09.603000
245	00:00:09.642000
246	00:00:09.682000
247	00:00:09.721000
248	00:00:09.761000
249	00:00:09.800000
250	00:00:09.840000
251	00:00:09.879000
252	00:00:09.919000
253	00:00:09.958000
254	00:00:09.998000
255	00:00:10.037000
256	00:00:10.077000
257	00:00:10.116000
258	00:00:10.156000
259	00:00:10.195000
260	00:00:10.235000
261	00:00:10.274000
262	00:00:10.314000
263	00:00:10.353000
264	00:00:10.393000
265	00:00:10.432000
266	00:00:10.472000
267	00:00:10.511000
268	00:00:10.551000
269	00:00:10.590000
270	00:00:10.630000
271	00:00:10.669000
272	00:00:10.709000
273	00:00:10.748000
274	00:00:10.788000
275	00:00:10.827000
276	00:00:10.867000
277	00:00:10.906000
278	00:00:10.946000
279	00:00:10.986000
280	00:00:11.025000
281	00:00:11.065000
282	00:00:11.104000
283	00:00:11.144000
284	00:00:11.183000
285	00:00:11.223000
286	00:00:11.262000
287	00:00:11.302000
288	00:00:11.341000
289	00:00:11.381000
290	00:00:11.420000
291	00:00:11.460000
292	00:00:11.499000
293	00:00:11.539000
294	00:00:11.578000
295	00:00:11.618000
296	00:00:11.657000
297	00:00:11.697000
298	00:00:11.736000
299	00:00:11.776000
300	00:00:11.815000
301	00:00:11.855000
302	00:00:11.894000
303	00:00:11.934000
304	00:00:11.973000
305	00:00:12.013000
306	00:00:12.052000
307	00:00:12.092000
308	00:00:12.131000
309	00:00:12.171000
310	00:00:12.210000
311	00:00:12.250000
312	00:00:12.289000
313	00:00:12.329000
314	00:00:12.368000
315	00:00:12.408000
316	00:00:12.447000
317	00:00:12.487000
318	00:00:12.527000
319	00:00:12.566000
320	00:00:12.606000
321	00:00:12.645000
322	00:00:12.685000
323	00:00:12.724000
324	00:00:12.764000
325	00:00:12.803000
326	00:00:12.843000
327	00:00:12.882000
328	00:00:12.922000
329	00:00:12.961000
330	00:00:13.001000
331	00:00:13.040000
332	00:00:13.080000
333	00:00:13.119000
334	00:00:13.159000
335	00:00:13.198000
336	00:00:13.238000
337	00:00:13.277000
338	00:00:13.317000
339	00:00:13.356000
340	00:00:13.396000
341	00:00:13.435000
342	00:00:13.475000
343	00:00:13.514000
344	00:00:13.554000
345	00:00:13.593000
346	00:00:13.633000
347	00:00:13.672000
348	00:00:13.712000
349	00:00:13.751000
350	00:00:13.791000
351	00:00:13.830000
352	00:00:13.870000
353	00:00:13.909000
354	00:00:13.949000
355	00:00:13.989000
356	00:00:14.028000
357	00:00:14.067000
358	00:00:14.107000
359	00:00:14.146000
360	00:00:14.186000
361	00:00:14.225000
362	00:00:14.265000
363	00:00:14.305000
364	00:00:14.344000
365	00:00:14.384000
366	00:00:14.423000
367	00:00:14.463000
368	00:00:14.502000
369	00:00:14.542000
370	00:00:14.581000
371	00:00:14.621000
372	00:00:14.660000
373	00:00:14.700000
374	00:00:14.739000
375	00:00:14.779000
376	00:00:14.818000
377	00:00:14.858000
378	00:00:14.897000
379	00:00:14.937000
380	00:00:14.976000
381	00:00:15.017000
382	00:00:15.056000
383	00:00:15.096000
384	00:00:15.135000
385	00:00:15.175000
386	00:00:15.214000
387	00:00:15.254000
388	00:00:15.293000
389	00:00:15.333000
390	00:00:15.372000
391	00:00:15.412000
392	00:00:15.451000
393	00:00:15.491000
394	00:00:15.530000
395	00:00:15.570000
396	00:00:15.609000
397	00:00:15.649000
398	00:00:15.688000
399	00:00:15.728000
400	00:00:15.767000
401	00:00:15.807000
402	00:00:15.847000
403	00:00:15.886000
404	00:00:15.926000
405	00:00:15.965000
406	00:00:16.005000
407	00:00:16.044000
408	00:00:16.084000
409	00:00:16.123000
410	00:00:16.163000
411	00:00:16.202000
412	00:00:16.242000
413	00:00:16.281000
414	00:00:16.321000
415	00:00:16.360000
416	00:00:16.400000
417	00:00:16.439000
418	00:00:16.479000
419	00:00:16.518000
420	00:00:16.558000
421	00:00:16.597000
422	00:00:16.637000
423	00:00:16.676000
424	00:00:16.716000
425	00:00:16.755000
426	00:00:16.795000
427	00:00:16.834000
428	00:00:16.874000
429	00:00:16.913000
430	00:00:16.953000
431	00:00:16.992000
432	00:00:17.032000
433	00:00:17.071000
434	00:00:17.111000
435	00:00:17.150000
436	00:00:17.190000
437	00:00:17.229000
438	00:00:17.269000
439	00:00:17.309000
440	00:00:17.348000
441	00:00:17.388000
442	00:00:17.427000
443	00:00:17.467000
444	00:00:17.506000
445	00:00:17.546000
446	00:00:17.585000
447	00:00:17.625000
448	00:00:17.664000
449	00:00:17.704000
450	00:00:17.743000
451	00:00:17.783000
452	00:00:17.822000
453	00:00:17.862000
454	00:00:17.901000
455	00:00:17.941000
456	00:00:17.980000
457	00:00:18.020000
458	00:00:18.059000
459	00:00:18.099000
460	00:00:18.138000
461	00:00:18.178000
462	00:00:18.217000
463	00:00:18.257000
464	00:00:18.316000
465	00:00:18.336000
466	00:00:18.375000
467	00:00:18.415000
468	00:00:18.454000
469	00:00:18.494000
470	00:00:18.533000
471	00:00:18.573000
472	00:00:18.612000
473	00:00:18.652000
474	00:00:18.691000
475	00:00:18.731000
476	00:00:18.770000
477	00:00:18.810000
478	00:00:18.850000
479	00:00:18.889000
480	00:00:18.929000
481	00:00:18.968000
482	00:00:19.008000
483	00:00:19.047000
484	00:00:19.086000
485	00:00:19.126000
486	00:00:19.166000
487	00:00:19.205000
488	00:00:19.245000
489	00:00:19.284000
490	00:00:19.324000
491	00:00:19.363000
492	00:00:19.403000
493	00:00:19.442000
494	00:00:19.482000
495	00:00:19.521000
496	00:00:19.561000
497	00:00:19.600000
498	00:00:19.640000
499	00:00:19.679000
500	00:00:19.719000
501	00:00:19.758000
502	00:00:19.798000
503	00:00:19.837000
504	00:00:19.877000
505	00:00:19.916000
506	00:00:19.956000
507	00:00:19.995000
508	00:00:20.035000
509	00:00:20.074000
510	00:00:20.114000
511	00:00:20.153000
512	00:00:20.193000
513	00:00:20.232000
514	00:00:20.272000
515	00:00:20.311000
516	00:00:20.351000
517	00:00:20.390000
518	00:00:20.430000
519	00:00:20.469000
520	00:00:20.509000
521	00:00:20.548000
522	00:00:20.588000
523	00:00:20.628000
524	00:00:20.667000
525	00:00:20.707000
526	00:00:20.746000
527	00:00:20.786000
528	00:00:20.825000
529	00:00:20.865000
530	00:00:20.904000
531	00:00:20.944000
532	00:00:20.983000
533	00:00:21.023000
534	00:00:21.062000
535	00:00:21.102000
536	00:00:21.141000
537	00:00:21.181000
538	00:00:21.220000
539	00:00:21.260000
540	00:00:21.299000
541	00:00:21.339000
542	00:00:21.378000
543	00:00:21.418000
544	00:00:21.457000
545	00:00:21.497000
546	00:00:21.536000
547	00:00:21.576000
548	00:00:21.615000
549	00:00:21.655000
550	00:00:21.694000
551	00:00:21.734000
552	00:00:21.773000
553	00:00:21.813000
554	00:00:21.852000
555	00:00:21.892000
556	00:00:21.931000
557	00:00:21.971000
558	00:00:22.010000
559	00:00:22.050000
560	00:00:22.089000
561	00:00:22.129000
562	00:00:22.169000
563	00:00:22.208000
564	00:00:22.248000
565	00:00:22.287000
566	00:00:22.327000
567	00:00:22.366000
568	00:00:22.406000
569	00:00:22.445000
570	00:00:22.485000
571	00:00:22.524000
572	00:00:22.564000
573	00:00:22.603000
574	00:00:22.643000
575	00:00:22.682000
576	00:00:22.722000
577	00:00:22.761000
578	00:00:22.801000
579	00:00:22.840000
580	00:00:22.880000
581	00:00:22.919000
582	00:00:22.959000
583	00:00:22.998000
584	00:00:23.038000
585	00:00:23.077000
586	00:00:23.117000
587	00:00:23.156000
588	00:00:23.196000
589	00:00:23.235000
590	00:00:23.275000
591	00:00:23.314000
592	00:00:23.354000
593	00:00:23.393000
594	00:00:23.433000
595	00:00:23.472000
596	00:00:23.512000
597	00:00:23.551000
598	00:00:23.591000
599	00:00:23.630000
600	00:00:23.670000
601	00:00:23.710000
602	00:00:23.749000
603	00:00:23.789000
604	00:00:23.828000
605	00:00:23.868000
606	00:00:23.907000
607	00:00:23.946000
608	00:00:23.986000
609	00:00:24.026000
610	00:00:24.065000
611	00:00:24.105000
612	00:00:24.144000
613	00:00:24.184000
614	00:00:24.223000
615	00:00:24.263000
616	00:00:24.302000
617	00:00:24.342000
618	00:00:24.381000
619	00:00:24.421000
620	00:00:24.460000
621	00:00:24.500000
622	00:00:24.539000
623	00:00:24.579000
624	00:00:24.618000
625	00:00:24.658000
626	00:00:24.697000
627	00:00:24.737000
628	00:00:24.776000
629	00:00:24.816000
630	00:00:24.855000
631	00:00:24.895000
632	00:00:24.934000
633	00:00:24.974000
634	00:00:25.014000
635	00:00:25.054000

## Sheet: #6a
frame	time	PC	TB	ant isth	mid isth	post isth
1	0:00:00
2	0:00:00.047000
3	0:00:00.078000
4	0:00:00.125000
5	0:00:00.156000
6	0:00:00.203000
7	0:00:00.234000
8	0:00:00.281000
9	0:00:00.312000
10	0:00:00.359000
11	0:00:00.390000
12	0:00:00.437000
13	0:00:00.454000
14	0:00:00.493000
15	0:00:00.533000
16	0:00:00.572000
17	0:00:00.612000
18	0:00:00.651000
19	0:00:00.691000
20	0:00:00.730000
21	0:00:00.770000
22	0:00:00.809000
23	0:00:00.849000
24	0:00:00.888000
25	0:00:00.928000
26	0:00:00.967000
27	0:00:01.007000
28	0:00:01.046000
29	0:00:01.086000
30	0:00:01.125000
31	0:00:01.165000
32	0:00:01.205000
33	0:00:01.245000
34	0:00:01.284000
35	0:00:01.324000
36	0:00:01.363000
37	0:00:01.403000
38	0:00:01.442000
39	0:00:01.482000
40	0:00:01.521000
41	0:00:01.561000
42	0:00:01.600000
43	0:00:01.640000
44	0:00:01.679000
45	0:00:01.719000
46	0:00:01.758000
47	0:00:01.798000
48	0:00:01.838000
49	0:00:01.877000
50	0:00:01.917000
51	0:00:01.956000
52	0:00:01.996000
53	0:00:02.035000
54	0:00:02.075000
55	0:00:02.114000
56	0:00:02.154000
57	0:00:02.193000
58	0:00:02.233000
59	0:00:02.272000
60	0:00:02.312000
61	0:00:02.351000
62	0:00:02.391000
63	0:00:02.430000
64	0:00:02.470000
65	0:00:02.509000
66	0:00:02.549000
67	0:00:02.588000
68	0:00:02.628000
69	0:00:02.667000
70	0:00:02.707000
71	0:00:02.746000
72	0:00:02.786000
73	0:00:02.825000
74	0:00:02.865000
75	0:00:02.904000
76	0:00:02.944000
77	0:00:02.983000
78	0:00:03.023000
79	0:00:03.062000
80	0:00:03.102000
81	0:00:03.141000
82	0:00:03.181000
83	0:00:03.220000
84	0:00:03.260000
85	0:00:03.299000
86	0:00:03.339000
87	0:00:03.379000
88	0:00:03.418000
89	0:00:03.458000
90	0:00:03.497000
91	0:00:03.537000
92	0:00:03.576000
93	0:00:03.616000
94	0:00:03.655000
95	0:00:03.695000
96	0:00:03.734000
97	0:00:03.774000
98	0:00:03.813000
99	0:00:03.853000
100	0:00:03.892000
101	0:00:03.932000
102	0:00:03.971000
103	0:00:04.011000
104	0:00:04.050000
105	0:00:04.090000
106	0:00:04.129000
107	0:00:04.169000
108	0:00:04.208000
109	0:00:04.248000
110	0:00:04.287000
111	0:00:04.327000
112	0:00:04.366000
113	0:00:04.406000
114	0:00:04.445000
115	0:00:04.485000
116	0:00:04.524000
117	0:00:04.564000
118	0:00:04.603000
119	0:00:04.643000
120	0:00:04.682000
121	0:00:04.722000
122	0:00:04.761000
123	0:00:04.801000
124	0:00:04.840000
125	0:00:04.880000
126	0:00:04.920000
127	0:00:04.959000
128	0:00:04.999000
129	0:00:05.038000
130	0:00:05.077000
131	0:00:05.117000
132	0:00:05.157000
133	0:00:05.196000
134	0:00:05.236000
135	0:00:05.275000
136	0:00:05.315000
137	0:00:05.354000
138	0:00:05.394000
139	0:00:05.433000
140	0:00:05.473000
141	0:00:05.512000
142	0:00:05.552000
143	0:00:05.591000
144	0:00:05.631000
145	0:00:05.670000
146	0:00:05.710000
147	0:00:05.749000
148	0:00:05.789000
149	0:00:05.828000
150	0:00:05.868000
151	0:00:05.907000
152	0:00:05.947000
153	0:00:05.986000
154	0:00:06.026000
155	0:00:06.065000
156	0:00:06.105000
157	0:00:06.144000
158	0:00:06.184000
159	0:00:06.223000
160	0:00:06.263000
161	0:00:06.302000
162	0:00:06.342000
163	0:00:06.381000
164	0:00:06.421000
165	0:00:06.460000
166	0:00:06.500000
167	0:00:06.539000
168	0:00:06.579000
169	0:00:06.618000
170	0:00:06.658000
171	0:00:06.698000
172	0:00:06.737000
173	0:00:06.777000
174	0:00:06.816000
175	0:00:06.856000
176	0:00:06.895000
177	0:00:06.935000
178	0:00:06.974000
179	0:00:07.014000
180	0:00:07.053000
181	0:00:07.093000
182	0:00:07.132000
183	0:00:07.172000
184	0:00:07.211000
185	0:00:07.251000
186	0:00:07.290000
187	0:00:07.330000
188	0:00:07.369000
189	0:00:07.409000
190	0:00:07.448000
191	0:00:07.488000
192	0:00:07.527000
193	0:00:07.567000
194	0:00:07.606000
195	0:00:07.646000
196	0:00:07.685000
197	0:00:07.725000
198	0:00:07.764000
199	0:00:07.804000
200	0:00:07.843000
201	0:00:07.883000
202	0:00:07.922000
203	0:00:07.962000
204	0:00:08.001000
205	0:00:08.041000
206	0:00:08.080000
207	0:00:08.120000
208	0:00:08.159000
209	0:00:08.199000
210	0:00:08.239000
211	0:00:08.278000
212	0:00:08.318000
213	0:00:08.357000
214	0:00:08.397000
215	0:00:08.436000
216	0:00:08.476000
217	0:00:08.515000
218	0:00:08.555000
219	0:00:08.594000
220	0:00:08.634000
221	0:00:08.673000
222	0:00:08.713000
223	0:00:08.752000
224	0:00:08.792000
225	0:00:08.831000
226	0:00:08.871000
227	0:00:08.910000
228	0:00:08.950000
229	0:00:08.989000
230	0:00:09.029000
231	0:00:09.068000
232	0:00:09.108000
233	0:00:09.147000
234	0:00:09.187000
235	0:00:09.226000
236	0:00:09.266000
237	0:00:09.305000
238	0:00:09.345000
239	0:00:09.384000
240	0:00:09.424000
241	0:00:09.463000
242	0:00:09.503000
243	0:00:09.542000
244	0:00:09.582000
245	0:00:09.621000
246	0:00:09.661000
247	0:00:09.701000
248	0:00:09.740000
249	0:00:09.780000
250	0:00:09.819000
251	0:00:09.859000
252	0:00:09.898000
253	0:00:09.937000
254	0:00:09.977000
255	0:00:10.017000
256	0:00:10.056000
257	0:00:10.096000
258	0:00:10.135000
259	0:00:10.175000
260	0:00:10.214000
261	0:00:10.254000
262	0:00:10.293000
263	0:00:10.333000
264	0:00:10.372000
265	0:00:10.412000
266	0:00:10.451000
267	0:00:10.491000
268	0:00:10.530000
269	0:00:10.570000
270	0:00:10.609000
271	0:00:10.649000
272	0:00:10.688000
273	0:00:10.728000
274	0:00:10.767000
275	0:00:10.807000
276	0:00:10.846000
277	0:00:10.886000
278	0:00:10.925000
279	0:00:10.965000
280	0:00:11.004000
281	0:00:11.044000
282	0:00:11.083000
283	0:00:11.123000
284	0:00:11.162000
285	0:00:11.203000
286	0:00:11.242000
287	0:00:11.282000
288	0:00:11.321000
289	0:00:11.361000
290	0:00:11.400000
291	0:00:11.440000
292	0:00:11.479000
293	0:00:11.519000
294	0:00:11.559000
295	0:00:11.598000
296	0:00:11.638000
297	0:00:11.677000
298	0:00:11.717000
299	0:00:11.756000
300	0:00:11.796000
301	0:00:11.835000
302	0:00:11.875000
303	0:00:11.914000
304	0:00:11.954000
305	0:00:11.993000
306	0:00:12.033000
307	0:00:12.072000
308	0:00:12.112000
309	0:00:12.151000
310	0:00:12.191000
311	0:00:12.230000
312	0:00:12.270000
313	0:00:12.309000
314	0:00:12.349000
315	0:00:12.388000
316	0:00:12.428000
317	0:00:12.467000
318	0:00:12.507000
319	0:00:12.546000
320	0:00:12.586000
321	0:00:12.625000
322	0:00:12.665000
323	0:00:12.704000
324	0:00:12.744000
325	0:00:12.783000
326	0:00:12.823000
327	0:00:12.862000
328	0:00:12.902000
329	0:00:12.941000
330	0:00:12.981000
331	0:00:13.020000
332	0:00:13.060000
333	0:00:13.100000
334	0:00:13.139000
335	0:00:13.179000
336	0:00:13.218000
337	0:00:13.258000
338	0:00:13.297000
339	0:00:13.337000
340	0:00:13.376000
341	0:00:13.416000
342	0:00:13.455000
343	0:00:13.495000
344	0:00:13.534000
345	0:00:13.574000
346	0:00:13.613000
347	0:00:13.653000
348	0:00:13.692000
349	0:00:13.732000
350	0:00:13.771000
351	0:00:13.811000
352	0:00:13.850000
353	0:00:13.890000
354	0:00:13.929000
355	0:00:13.969000
356	0:00:14.008000
357	0:00:14.048000
358	0:00:14.087000
359	0:00:14.127000
360	0:00:14.166000
361	0:00:14.206000
362	0:00:14.245000
363	0:00:14.285000
364	0:00:14.324000
365	0:00:14.364000
366	0:00:14.403000
367	0:00:14.443000
368	0:00:14.482000
369	0:00:14.522000
370	0:00:14.562000
371	0:00:14.601000
372	0:00:14.641000
373	0:00:14.680000
374	0:00:14.720000
375	0:00:14.759000
376	0:00:14.798000
377	0:00:14.838000
378	0:00:14.878000
379	0:00:14.917000
380	0:00:14.957000
381	0:00:14.996000
382	0:00:15.036000
383	0:00:15.075000
384	0:00:15.115000
385	0:00:15.154000
386	0:00:15.194000
387	0:00:15.233000
388	0:00:15.273000
389	0:00:15.312000
390	0:00:15.352000
391	0:00:15.391000
392	0:00:15.431000
393	0:00:15.470000
394	0:00:15.510000
395	0:00:15.549000
396	0:00:15.589000
397	0:00:15.628000
398	0:00:15.668000
399	0:00:15.707000
400	0:00:15.747000
401	0:00:15.786000
402	0:00:15.826000
403	0:00:15.865000
404	0:00:15.905000
405	0:00:15.944000
406	0:00:15.984000
407	0:00:16.023000
408	0:00:16.063000
409	0:00:16.102000
410	0:00:16.142000
411	0:00:16.181000
412	0:00:16.221000
413	0:00:16.260000
414	0:00:16.300000
415	0:00:16.339000
416	0:00:16.379000
417	0:00:16.419000
418	0:00:16.458000
419	0:00:16.498000
420	0:00:16.537000
421	0:00:16.577000
422	0:00:16.616000
423	0:00:16.656000
424	0:00:16.695000
425	0:00:16.735000
426	0:00:16.774000
427	0:00:16.814000
428	0:00:16.853000
429	0:00:16.893000
430	0:00:16.932000
431	0:00:16.972000
432	0:00:17.011000
433	0:00:17.051000
434	0:00:17.090000
435	0:00:17.130000
436	0:00:17.169000
437	0:00:17.209000
438	0:00:17.248000
439	0:00:17.288000
440	0:00:17.327000
441	0:00:17.367000
442	0:00:17.406000
443	0:00:17.446000
444	0:00:17.485000
445	0:00:17.525000
446	0:00:17.564000
447	0:00:17.604000
448	0:00:17.643000
449	0:00:17.683000
450	0:00:17.722000
451	0:00:17.762000
452	0:00:17.801000
453	0:00:17.841000
454	0:00:17.881000
455	0:00:17.920000
456	0:00:17.960000
457	0:00:17.999000
458	0:00:18.039000
459	0:00:18.078000
460	0:00:18.118000
461	0:00:18.157000
462	0:00:18.197000
463	0:00:18.236000
464	0:00:18.276000
465	0:00:18.315000
466	0:00:18.355000
467	0:00:18.394000
468	0:00:18.434000
469	0:00:18.473000
470	0:00:18.513000
471	0:00:18.552000
472	0:00:18.592000
473	0:00:18.631000
474	0:00:18.671000
475	0:00:18.710000
476	0:00:18.750000
477	0:00:18.789000
478	0:00:18.829000
479	0:00:18.868000
480	0:00:18.908000
481	0:00:18.947000
482	0:00:18.987000
483	0:00:19.026000
484	0:00:19.066000
485	0:00:19.105000
486	0:00:19.145000
487	0:00:19.184000
488	0:00:19.224000
489	0:00:19.263000
490	0:00:19.303000
491	0:00:19.342000
492	0:00:19.382000
493	0:00:19.422000
494	0:00:19.461000
495	0:00:19.501000
496	0:00:19.540000
497	0:00:19.580000
498	0:00:19.619000
499	0:00:19.658000
500	0:00:19.698000
501	0:00:19.738000
502	0:00:19.777000
503	0:00:19.817000
504	0:00:19.856000
505	0:00:19.896000
506	0:00:19.935000
507	0:00:19.975000
508	0:00:20.014000
509	0:00:20.054000
510	0:00:20.093000
511	0:00:20.133000
512	0:00:20.172000
513	0:00:20.212000
514	0:00:20.251000
515	0:00:20.291000
516	0:00:20.330000
517	0:00:20.370000
518	0:00:20.409000
519	0:00:20.449000
520	0:00:20.488000
521	0:00:20.528000
522	0:00:20.567000
523	0:00:20.607000
524	0:00:20.646000
525	0:00:20.686000
526	0:00:20.725000
527	0:00:20.765000
528	0:00:20.804000
529	0:00:20.844000
530	0:00:20.883000
531	0:00:20.923000
532	0:00:20.962000
533	0:00:21.002000
534	0:00:21.041000
535	0:00:21.081000
536	0:00:21.120000
537	0:00:21.160000
538	0:00:21.200000
539	0:00:21.240000
540	0:00:21.280000
541	0:00:21.319000
542	0:00:21.359000
543	0:00:21.398000
544	0:00:21.438000
545	0:00:21.477000
546	0:00:21.517000
547	0:00:21.556000
548	0:00:21.596000
549	0:00:21.635000
550	0:00:21.675000
551	0:00:21.714000
552	0:00:21.754000
553	0:00:21.793000
554	0:00:21.833000
555	0:00:21.872000
556	0:00:21.912000
557	0:00:21.951000
558	0:00:21.991000
559	0:00:22.030000
560	0:00:22.070000
561	0:00:22.109000
562	0:00:22.149000
563	0:00:22.188000
564	0:00:22.228000
565	0:00:22.267000
566	0:00:22.307000
567	0:00:22.346000
568	0:00:22.386000
569	0:00:22.425000
570	0:00:22.465000
571	0:00:22.504000
572	0:00:22.544000
573	0:00:22.583000
574	0:00:22.623000
575	0:00:22.662000
576	0:00:22.702000
577	0:00:22.742000
578	0:00:22.781000
579	0:00:22.821000
580	0:00:22.860000
581	0:00:22.900000
582	0:00:22.939000
583	0:00:22.979000
584	0:00:23.018000
585	0:00:23.058000
586	0:00:23.097000
587	0:00:23.137000
588	0:00:23.176000
589	0:00:23.216000
590	0:00:23.255000
591	0:00:23.295000
592	0:00:23.334000
593	0:00:23.374000
594	0:00:23.413000
595	0:00:23.453000
596	0:00:23.492000
597	0:00:23.532000
598	0:00:23.571000
599	0:00:23.611000
600	0:00:23.650000
601	0:00:23.690000
602	0:00:23.729000
603	0:00:23.769000
604	0:00:23.808000
605	0:00:23.848000
606	0:00:23.887000
607	0:00:23.927000
608	0:00:23.966000
609	0:00:24.006000
610	0:00:24.045000
611	0:00:24.085000
612	0:00:24.124000
613	0:00:24.164000
614	0:00:24.203000
615	0:00:24.243000
616	0:00:24.283000
617	0:00:24.322000
618	0:00:24.362000
619	0:00:24.401000
620	0:00:24.441000
621	0:00:24.480000
622	0:00:24.519000
623	0:00:24.559000
624	0:00:24.599000
625	0:00:24.638000
626	0:00:24.678000
627	0:00:24.717000
628	0:00:24.757000
629	0:00:24.796000
630	0:00:24.836000
631	0:00:24.875000
632	0:00:24.915000
633	0:00:24.954000
634	0:00:24.994000
635	0:00:25.033000
636	0:00:25.073000
637	0:00:25.112000
638	0:00:25.152000
639	0:00:25.191000
640	0:00:25.231000
641	0:00:25.270000
642	0:00:25.310000
643	0:00:25.349000
644	0:00:25.389000
645	0:00:25.428000
646	0:00:25.468000
647	0:00:25.507000
648	0:00:25.547000
649	0:00:25.586000
650	0:00:25.626000
651	0:00:25.665000
652	0:00:25.705000
653	0:00:25.744000
654	0:00:25.784000
655	0:00:25.823000
656	0:00:25.863000
657	0:00:25.902000
658	0:00:25.942000
659	0:00:25.981000
660	0:00:26.021000
661	0:00:26.061000
662	0:00:26.100000
663	0:00:26.140000
664	0:00:26.179000
665	0:00:26.219000
666	0:00:26.258000
667	0:00:26.298000
668	0:00:26.337000
669	0:00:26.377000
670	0:00:26.416000
671	0:00:26.456000
672	0:00:26.495000
673	0:00:26.535000
674	0:00:26.574000
675	0:00:26.614000
676	0:00:26.653000
677	0:00:26.693000
678	0:00:26.732000
679	0:00:26.772000
680	0:00:26.811000
681	0:00:26.851000
682	0:00:26.890000
683	0:00:26.930000
684	0:00:26.969000
685	0:00:27.009000
686	0:00:27.048000
687	0:00:27.088000
688	0:00:27.127000
689	0:00:27.167000
690	0:00:27.206000
691	0:00:27.246000
692	0:00:27.285000
693	0:00:27.325000
694	0:00:27.364000
695	0:00:27.404000
696	0:00:27.443000
697	0:00:27.483000
698	0:00:27.522000
699	0:00:27.562000
700	0:00:27.602000
701	0:00:27.641000
702	0:00:27.681000
703	0:00:27.720000
704	0:00:27.760000
705	0:00:27.799000
706	0:00:27.839000
707	0:00:27.878000
708	0:00:27.918000
709	0:00:27.957000
710	0:00:27.997000
711	0:00:28.036000
712	0:00:28.076000
713	0:00:28.115000
714	0:00:28.155000
715	0:00:28.194000
716	0:00:28.234000
717	0:00:28.273000
718	0:00:28.313000
719	0:00:28.352000
720	0:00:28.392000
721	0:00:28.431000
722	0:00:28.471000
723	0:00:28.510000
724	0:00:28.550000
725	0:00:28.589000
726	0:00:28.629000
727	0:00:28.668000
728	0:00:28.708000
729	0:00:28.747000
730	0:00:28.787000
731	0:00:28.826000
732	0:00:28.866000
733	0:00:28.905000
734	0:00:28.945000
735	0:00:28.984000
736	0:00:29.024000
737	0:00:29.063000
738	0:00:29.103000
739	0:00:29.143000
740	0:00:29.182000
741	0:00:29.222000
742	0:00:29.261000
743	0:00:29.300000
744	0:00:29.340000
745	0:00:29.380000
746	0:00:29.419000
747	0:00:29.459000
748	0:00:29.498000
749	0:00:29.538000
750	0:00:29.577000
751	0:00:29.617000
752	0:00:29.656000
753	0:00:29.696000
754	0:00:29.735000
755	0:00:29.775000
756	0:00:29.814000
757	0:00:29.854000
758	0:00:29.893000

## Sheet: #1b
frame	time	PC	TB	ant isth	mid isth	post isth		2016-09-12
1	00:00:00
2	00:00:00.039000
3	00:00:00.079000
4	00:00:00.118000
5	00:00:00.158000
6	00:00:00.197000
7	00:00:00.237000
8	00:00:00.276000
9	00:00:00.316000
10	00:00:00.356000
11	00:00:00.395000
12	00:00:00.435000
13	00:00:00.474000
14	00:00:00.513000
15	00:00:00.553000
16	00:00:00.593000
17	00:00:00.632000
18	00:00:00.672000
19	00:00:00.711000
20	00:00:00.751000
21	00:00:00.790000
22	00:00:00.830000
23	00:00:00.869000
24	00:00:00.909000
25	00:00:00.948000
26	00:00:00.988000
27	00:00:01.027000
28	00:00:01.067000
29	00:00:01.106000
30	00:00:01.146000
31	00:00:01.185000
32	00:00:01.225000
33	00:00:01.264000
34	00:00:01.304000
35	00:00:01.343000
36	00:00:01.383000
37	00:00:01.422000
38	00:00:01.462000
39	00:00:01.501000
40	00:00:01.541000
41	00:00:01.580000
42	00:00:01.620000
43	00:00:01.659000
44	00:00:01.699000
45	00:00:01.738000
46	00:00:01.778000
47	00:00:01.817000
48	00:00:01.857000
49	00:00:01.896000
50	00:00:01.936000
51	00:00:01.975000
52	00:00:02.015000
53	00:00:02.054000
54	00:00:02.094000
55	00:00:02.134000
56	00:00:02.173000
57	00:00:02.213000
58	00:00:02.252000
59	00:00:02.292000
60	00:00:02.331000
61	00:00:02.371000
62	00:00:02.410000
63	00:00:02.450000
64	00:00:02.489000
65	00:00:02.529000
66	00:00:02.568000
67	00:00:02.608000
68	00:00:02.647000
69	00:00:02.687000
70	00:00:02.726000
71	00:00:02.766000
72	00:00:02.805000
73	00:00:02.845000
74	00:00:02.884000
75	00:00:02.924000
76	00:00:02.963000
77	00:00:03.003000
78	00:00:03.042000
79	00:00:03.082000
80	00:00:03.121000
81	00:00:03.161000
82	00:00:03.200000
83	00:00:03.240000
84	00:00:03.279000
85	00:00:03.319000
86	00:00:03.358000
87	00:00:03.398000
88	00:00:03.437000
89	00:00:03.477000
90	00:00:03.516000
91	00:00:03.556000
92	00:00:03.595000
93	00:00:03.635000
94	00:00:03.675000
95	00:00:03.714000
96	00:00:03.754000
97	00:00:03.793000
98	00:00:03.833000
99	00:00:03.872000
100	00:00:03.912000
101	00:00:03.951000
102	00:00:03.991000
103	00:00:04.030000
104	00:00:04.070000
105	00:00:04.109000
106	00:00:04.149000
107	00:00:04.188000
108	00:00:04.228000
109	00:00:04.267000
110	00:00:04.307000
111	00:00:04.346000
112	00:00:04.386000
113	00:00:04.425000
114	00:00:04.465000
115	00:00:04.504000
116	00:00:04.544000
117	00:00:04.583000
118	00:00:04.623000
119	00:00:04.662000
120	00:00:04.702000
121	00:00:04.741000
122	00:00:04.781000
123	00:00:04.820000
124	00:00:04.860000
125	00:00:04.899000
126	00:00:04.939000
127	00:00:04.978000
128	00:00:05.019000
129	00:00:05.058000
130	00:00:05.098000
131	00:00:05.138000
132	00:00:05.177000
133	00:00:05.217000
134	00:00:05.256000
135	00:00:05.296000
136	00:00:05.335000
137	00:00:05.374000
138	00:00:05.414000
139	00:00:05.454000
140	00:00:05.493000
141	00:00:05.533000
142	00:00:05.572000
143	00:00:05.612000
144	00:00:05.651000
145	00:00:05.691000
146	00:00:05.730000
147	00:00:05.770000
148	00:00:05.809000
149	00:00:05.849000
150	00:00:05.888000
151	00:00:05.928000
152	00:00:05.967000
153	00:00:06.007000
154	00:00:06.046000
155	00:00:06.086000
156	00:00:06.125000
157	00:00:06.165000
158	00:00:06.204000
159	00:00:06.244000
160	00:00:06.283000
161	00:00:06.323000
162	00:00:06.362000
163	00:00:06.402000
164	00:00:06.441000
165	00:00:06.481000
166	00:00:06.520000
167	00:00:06.560000
168	00:00:06.599000
169	00:00:06.639000
170	00:00:06.678000
171	00:00:06.718000
172	00:00:06.757000
173	00:00:06.797000
174	00:00:06.836000
175	00:00:06.876000
176	00:00:06.915000
177	00:00:06.955000
178	00:00:06.995000
179	00:00:07.034000
180	00:00:07.074000
181	00:00:07.113000
182	00:00:07.153000
183	00:00:07.192000
184	00:00:07.232000
185	00:00:07.271000
186	00:00:07.311000
187	00:00:07.350000
188	00:00:07.390000
189	00:00:07.429000
190	00:00:07.469000
191	00:00:07.508000
192	00:00:07.548000
193	00:00:07.587000
194	00:00:07.627000
195	00:00:07.666000
196	00:00:07.706000
197	00:00:07.745000
198	00:00:07.785000
199	00:00:07.824000
200	00:00:07.864000
201	00:00:07.903000
202	00:00:07.943000
203	00:00:07.982000
204	00:00:08.022000
205	00:00:08.061000
206	00:00:08.101000
207	00:00:08.140000
208	00:00:08.180000
209	00:00:08.219000
210	00:00:08.259000
211	00:00:08.298000
212	00:00:08.338000
213	00:00:08.377000
214	00:00:08.417000
215	00:00:08.457000
216	00:00:08.496000
217	00:00:08.536000
218	00:00:08.575000
219	00:00:08.615000
220	00:00:08.654000
221	00:00:08.694000
222	00:00:08.733000
223	00:00:08.773000
224	00:00:08.812000
225	00:00:08.852000
226	00:00:08.891000
227	00:00:08.931000
228	00:00:08.970000
229	00:00:09.010000
230	00:00:09.049000
231	00:00:09.089000
232	00:00:09.128000
233	00:00:09.168000
234	00:00:09.207000
235	00:00:09.247000
236	00:00:09.286000
237	00:00:09.326000
238	00:00:09.365000
239	00:00:09.405000
240	00:00:09.444000
241	00:00:09.484000
242	00:00:09.523000
243	00:00:09.563000
244	00:00:09.602000
245	00:00:09.642000
246	00:00:09.681000
247	00:00:09.721000
248	00:00:09.760000
249	00:00:09.800000
250	00:00:09.839000
251	00:00:09.879000
252	00:00:09.918000
253	00:00:09.958000
254	00:00:09.998000
255	00:00:10.037000
256	00:00:10.077000
257	00:00:10.116000
258	00:00:10.156000
259	00:00:10.195000
260	00:00:10.235000
261	00:00:10.274000
262	00:00:10.314000
263	00:00:10.353000
264	00:00:10.393000
265	00:00:10.432000
266	00:00:10.472000
267	00:00:10.511000
268	00:00:10.551000
269	00:00:10.590000
270	00:00:10.630000
271	00:00:10.669000
272	00:00:10.709000
273	00:00:10.748000
274	00:00:10.788000
275	00:00:10.827000
276	00:00:10.867000
277	00:00:10.906000
278	00:00:10.946000
279	00:00:10.985000
280	00:00:11.025000
281	00:00:11.064000
282	00:00:11.104000
283	00:00:11.143000
284	00:00:11.183000
285	00:00:11.222000
286	00:00:11.262000
287	00:00:11.301000
288	00:00:11.341000
289	00:00:11.380000
290	00:00:11.420000
291	00:00:11.459000
292	00:00:11.499000
293	00:00:11.539000
294	00:00:11.578000
295	00:00:11.617000
296	00:00:11.657000
297	00:00:11.696000
298	00:00:11.736000
299	00:00:11.776000
300	00:00:11.815000
301	00:00:11.855000
302	00:00:11.894000
303	00:00:11.934000
304	00:00:11.973000
305	00:00:12.013000
306	00:00:12.052000
307	00:00:12.092000
308	00:00:12.131000
309	00:00:12.171000
310	00:00:12.210000
311	00:00:12.250000
312	00:00:12.289000
313	00:00:12.329000
314	00:00:12.368000
315	00:00:12.408000
316	00:00:12.447000
317	00:00:12.487000
318	00:00:12.526000
319	00:00:12.566000
320	00:00:12.605000
321	00:00:12.645000
322	00:00:12.684000
323	00:00:12.724000
324	00:00:12.763000
325	00:00:12.803000
326	00:00:12.842000
327	00:00:12.882000
328	00:00:12.921000
329	00:00:12.961000
330	00:00:13
331	00:00:13.040000
332	00:00:13.079000
333	00:00:13.119000
334	00:00:13.158000
335	00:00:13.198000
336	00:00:13.237000
337	00:00:13.277000
338	00:00:13.317000
339	00:00:13.356000
340	00:00:13.396000
341	00:00:13.435000
342	00:00:13.475000
343	00:00:13.514000
344	00:00:13.554000
345	00:00:13.593000
346	00:00:13.633000
347	00:00:13.672000
348	00:00:13.712000
349	00:00:13.751000
350	00:00:13.791000
351	00:00:13.830000
352	00:00:13.870000
353	00:00:13.909000
354	00:00:13.949000
355	00:00:13.988000
356	00:00:14.028000
357	00:00:14.067000
358	00:00:14.107000
359	00:00:14.146000
360	00:00:14.186000
361	00:00:14.225000
362	00:00:14.265000
363	00:00:14.304000
364	00:00:14.344000
365	00:00:14.383000
366	00:00:14.423000
367	00:00:14.462000
368	00:00:14.502000
369	00:00:14.541000
370	00:00:14.581000
371	00:00:14.620000
372	00:00:14.660000
373	00:00:14.699000
374	00:00:14.739000
375	00:00:14.778000
376	00:00:14.818000
377	00:00:14.858000
378	00:00:14.897000
379	00:00:14.937000
380	00:00:14.976000
381	00:00:15.016000
382	00:00:15.056000
383	00:00:15.096000
384	00:00:15.135000
385	00:00:15.175000
386	00:00:15.214000
387	00:00:15.254000
388	00:00:15.293000
389	00:00:15.333000
390	00:00:15.372000
391	00:00:15.412000
392	00:00:15.451000
393	00:00:15.491000
394	00:00:15.530000
395	00:00:15.570000
396	00:00:15.609000
397	00:00:15.649000

## Sheet: #2b
frame	time	PC	TB	ant isth	mid isth	post isth
500	00:00:19.719000
501	00:00:19.758000
502	00:00:19.798000
503	00:00:19.837000
504	00:00:19.877000
505	00:00:19.916000
506	00:00:19.956000
507	00:00:19.995000
508	00:00:20.035000
509	00:00:20.074000
510	00:00:20.114000
511	00:00:20.153000
512	00:00:20.193000
513	00:00:20.232000
514	00:00:20.272000
515	00:00:20.311000
516	00:00:20.351000
517	00:00:20.390000
518	00:00:20.430000
519	00:00:20.469000
520	00:00:20.509000
521	00:00:20.548000
522	00:00:20.588000
523	00:00:20.627000
524	00:00:20.667000
525	00:00:20.706000
526	00:00:20.746000
527	00:00:20.786000
528	00:00:20.825000
529	00:00:20.865000
530	00:00:20.904000
531	00:00:20.944000
532	00:00:20.983000
533	00:00:21.023000
534	00:00:21.062000
535	00:00:21.102000
536	00:00:21.141000
537	00:00:21.181000
538	00:00:21.220000
539	00:00:21.260000
540	00:00:21.299000
541	00:00:21.339000
542	00:00:21.378000
543	00:00:21.418000
544	00:00:21.457000
545	00:00:21.497000
546	00:00:21.536000
547	00:00:21.576000
548	00:00:21.615000
549	00:00:21.655000
550	00:00:21.694000
551	00:00:21.734000
552	00:00:21.773000
553	00:00:21.813000
554	00:00:21.852000
555	00:00:21.892000
556	00:00:21.931000
557	00:00:21.971000
558	00:00:22.010000
559	00:00:22.050000
560	00:00:22.089000
561	00:00:22.129000
562	00:00:22.168000
563	00:00:22.208000
564	00:00:22.247000
565	00:00:22.287000
566	00:00:22.327000
567	00:00:22.366000
568	00:00:22.406000
569	00:00:22.445000
570	00:00:22.485000
571	00:00:22.524000
572	00:00:22.564000
573	00:00:22.603000
574	00:00:22.643000
575	00:00:22.682000
576	00:00:22.722000
577	00:00:22.761000
578	00:00:22.801000
579	00:00:22.840000
580	00:00:22.880000
581	00:00:22.919000
582	00:00:22.959000
583	00:00:22.998000
584	00:00:23.038000
585	00:00:23.077000
586	00:00:23.117000
587	00:00:23.156000
588	00:00:23.196000
589	00:00:23.235000
590	00:00:23.275000
591	00:00:23.314000
592	00:00:23.354000
593	00:00:23.393000
594	00:00:23.433000
595	00:00:23.472000
596	00:00:23.512000
597	00:00:23.551000
598	00:00:23.591000
599	00:00:23.630000
600	00:00:23.670000
601	00:00:23.709000
602	00:00:23.749000
603	00:00:23.788000
604	00:00:23.828000
605	00:00:23.868000
606	00:00:23.907000
607	00:00:23.946000
608	00:00:23.986000
609	00:00:24.025000
610	00:00:24.065000
611	00:00:24.105000
612	00:00:24.144000
613	00:00:24.184000
614	00:00:24.223000
615	00:00:24.263000
616	00:00:24.302000
617	00:00:24.342000
618	00:00:24.381000
619	00:00:24.421000
620	00:00:24.460000
621	00:00:24.500000
622	00:00:24.539000
623	00:00:24.579000
624	00:00:24.618000
625	00:00:24.658000
626	00:00:24.697000
627	00:00:24.737000
628	00:00:24.776000
629	00:00:24.816000
630	00:00:24.855000
631	00:00:24.895000
632	00:00:24.934000
633	00:00:24.974000
634	00:00:25.013000
635	00:00:25.053000
636	00:00:25.092000
637	00:00:25.132000
638	00:00:25.171000
639	00:00:25.211000
640	00:00:25.250000
641	00:00:25.291000
642	00:00:25.330000
643	00:00:25.370000
644	00:00:25.409000
645	00:00:25.449000
646	00:00:25.488000
647	00:00:25.528000
648	00:00:25.567000
649	00:00:25.607000
650	00:00:25.647000
651	00:00:25.686000
652	00:00:25.726000
653	00:00:25.765000
654	00:00:25.805000
655	00:00:25.844000
656	00:00:25.884000
657	00:00:25.923000
658	00:00:25.963000
659	00:00:26.002000
660	00:00:26.042000
661	00:00:26.081000
662	00:00:26.121000
663	00:00:26.160000
664	00:00:26.200000
665	00:00:26.239000
666	00:00:26.279000
667	00:00:26.318000
668	00:00:26.358000
669	00:00:26.397000
670	00:00:26.437000
671	00:00:26.476000
672	00:00:26.516000
673	00:00:26.555000
674	00:00:26.595000
675	00:00:26.634000
676	00:00:26.674000
677	00:00:26.713000
678	00:00:26.753000
679	00:00:26.792000
680	00:00:26.832000
681	00:00:26.871000
682	00:00:26.911000
683	00:00:26.950000
684	00:00:26.990000
685	00:00:27.029000
686	00:00:27.069000
687	00:00:27.108000
688	00:00:27.148000
689	00:00:27.188000
690	00:00:27.227000
691	00:00:27.267000
692	00:00:27.306000
693	00:00:27.346000
694	00:00:27.385000
695	00:00:27.425000
696	00:00:27.464000
697	00:00:27.504000
698	00:00:27.543000
699	00:00:27.583000
700	00:00:27.622000
701	00:00:27.662000
702	00:00:27.701000
703	00:00:27.741000
704	00:00:27.780000
705	00:00:27.820000
706	00:00:27.859000
707	00:00:27.899000
708	00:00:27.938000
709	00:00:27.978000
710	00:00:28.017000
711	00:00:28.057000
712	00:00:28.096000
713	00:00:28.136000
714	00:00:28.175000
715	00:00:28.215000
716	00:00:28.254000
717	00:00:28.294000
718	00:00:28.333000
719	00:00:28.373000
720	00:00:28.412000
721	00:00:28.452000
722	00:00:28.491000
723	00:00:28.531000
724	00:00:28.570000
725	00:00:28.610000
726	00:00:28.649000
727	00:00:28.689000
728	00:00:28.728000
729	00:00:28.768000
730	00:00:28.807000
731	00:00:28.847000
732	00:00:28.886000
733	00:00:28.926000
734	00:00:28.966000
735	00:00:29.005000
736	00:00:29.045000
737	00:00:29.084000
738	00:00:29.124000
739	00:00:29.163000
740	00:00:29.203000
741	00:00:29.242000
742	00:00:29.282000
743	00:00:29.321000
744	00:00:29.361000
745	00:00:29.400000
746	00:00:29.440000
747	00:00:29.479000
748	00:00:29.519000
749	00:00:29.558000
750	00:00:29.598000
751	00:00:29.637000
752	00:00:29.677000
753	00:00:29.716000
754	00:00:29.756000
755	00:00:29.795000
756	00:00:29.835000
757	00:00:29.874000
758	00:00:29.914000
759	00:00:29.953000
760	00:00:29.993000
761	00:00:30.032000
762	00:00:30.072000
763	00:00:30.111000
764	00:00:30.151000
765	00:00:30.190000
766	00:00:30.230000
767	00:00:30.269000
768	00:00:30.309000
769	00:00:30.348000
770	00:00:30.388000
771	00:00:30.428000
772	00:00:30.467000
773	00:00:30.507000
774	00:00:30.546000
775	00:00:30.586000
776	00:00:30.625000
777	00:00:30.665000
778	00:00:30.704000
779	00:00:30.744000
780	00:00:30.783000
781	00:00:30.823000
782	00:00:30.862000
783	00:00:30.902000
784	00:00:30.941000
785	00:00:30.981000
786	00:00:31.020000
787	00:00:31.060000
788	00:00:31.099000
789	00:00:31.139000
790	00:00:31.178000
791	00:00:31.218000
792	00:00:31.257000
793	00:00:31.297000
794	00:00:31.336000
795	00:00:31.376000
796	00:00:31.415000
797	00:00:31.455000
798	00:00:31.494000
799	00:00:31.534000
800	00:00:31.573000
801	00:00:31.613000
802	00:00:31.652000
803	00:00:31.692000
804	00:00:31.731000
805	00:00:31.771000
806	00:00:31.810000
807	00:00:31.850000
808	00:00:31.889000
809	00:00:31.929000
810	00:00:31.969000
811	00:00:32.008000
812	00:00:32.048000
813	00:00:32.087000
814	00:00:32.127000
815	00:00:32.166000
816	00:00:32.206000
817	00:00:32.245000
818	00:00:32.285000
819	00:00:32.324000
820	00:00:32.364000
821	00:00:32.403000
822	00:00:32.443000
823	00:00:32.482000
824	00:00:32.522000
825	00:00:32.561000
826	00:00:32.601000
827	00:00:32.640000
828	00:00:32.680000
829	00:00:32.719000
830	00:00:32.759000
831	00:00:32.798000
832	00:00:32.838000
833	00:00:32.877000
834	00:00:32.917000
835	00:00:32.956000
836	00:00:32.996000
837	00:00:33.035000
838	00:00:33.075000
839	00:00:33.114000
840	00:00:33.154000
841	00:00:33.193000
842	00:00:33.233000
843	00:00:33.272000
844	00:00:33.312000
845	00:00:33.351000
846	00:00:33.391000
847	00:00:33.430000
848	00:00:33.470000
849	00:00:33.510000
850	00:00:33.549000
851	00:00:33.588000
852	00:00:33.628000
853	00:00:33.667000
854	00:00:33.707000
855	00:00:33.747000
856	00:00:33.786000
857	00:00:33.826000
858	00:00:33.865000
859	00:00:33.905000
860	00:00:33.944000
861	00:00:33.984000
862	00:00:34.023000
863	00:00:34.063000
864	00:00:34.102000
865	00:00:34.142000
866	00:00:34.181000
867	00:00:34.221000
868	00:00:34.260000
869	00:00:34.300000
870	00:00:34.339000
871	00:00:34.379000
872	00:00:34.418000
873	00:00:34.458000
874	00:00:34.497000
875	00:00:34.537000
876	00:00:34.576000
877	00:00:34.616000
878	00:00:34.655000
879	00:00:34.695000
880	00:00:34.734000
881	00:00:34.774000
882	00:00:34.813000
883	00:00:34.853000
884	00:00:34.892000
885	00:00:34.932000
886	00:00:34.971000
887	00:00:35.011000
888	00:00:35.050000
889	00:00:35.090000
890	00:00:35.129000
891	00:00:35.169000
892	00:00:35.208000
893	00:00:35.248000
894	00:00:35.289000
895	00:00:35.328000
896	00:00:35.368000
897	00:00:35.407000
898	00:00:35.447000
899	00:00:35.486000
900	00:00:35.526000
901	00:00:35.565000
902	00:00:35.605000
903	00:00:35.644000
904	00:00:35.684000
905	00:00:35.723000
906	00:00:35.763000
907	00:00:35.802000
908	00:00:35.842000
909	00:00:35.881000
910	00:00:35.921000
911	00:00:35.960000
912	00:00:36
913	00:00:36.039000
914	00:00:36.079000
915	00:00:36.118000
916	00:00:36.158000
917	00:00:36.197000
918	00:00:36.237000
919	00:00:36.276000
920	00:00:36.316000
921	00:00:36.355000
922	00:00:36.395000
923	00:00:36.434000
924	00:00:36.474000
925	00:00:36.513000
926	00:00:36.553000
927	00:00:36.592000
928	00:00:36.632000
929	00:00:36.671000
930	00:00:36.711000
931	00:00:36.750000
932	00:00:36.790000
933	00:00:36.830000
934	00:00:36.869000
935	00:00:36.909000
936	00:00:36.948000
937	00:00:36.988000
938	00:00:37.027000
939	00:00:37.067000
940	00:00:37.106000
941	00:00:37.146000
942	00:00:37.185000
943	00:00:37.225000
944	00:00:37.264000
945	00:00:37.304000
946	00:00:37.343000
947	00:00:37.383000
948	00:00:37.422000
949	00:00:37.462000
950	00:00:37.501000
951	00:00:37.541000
952	00:00:37.580000
953	00:00:37.620000
954	00:00:37.659000
955	00:00:37.699000
956	00:00:37.738000
957	00:00:37.778000
958	00:00:37.817000
959	00:00:37.857000
960	00:00:37.896000
961	00:00:37.936000
962	00:00:37.975000
963	00:00:38.015000
964	00:00:38.054000
965	00:00:38.094000
966	00:00:38.133000
967	00:00:38.173000
968	00:00:38.212000
969	00:00:38.252000
970	00:00:38.292000
971	00:00:38.331000
972	00:00:38.371000
973	00:00:38.410000
974	00:00:38.450000
975	00:00:38.489000
976	00:00:38.528000
977	00:00:38.568000
978	00:00:38.608000
979	00:00:38.647000
980	00:00:38.687000
981	00:00:38.726000
982	00:00:38.766000
983	00:00:38.805000
984	00:00:38.845000
985	00:00:38.884000
986	00:00:38.924000
987	00:00:38.963000
988	00:00:39.003000
989	00:00:39.042000
990	00:00:39.082000
991	00:00:39.121000
992	00:00:39.161000
993	00:00:39.200000
994	00:00:39.240000
995	00:00:39.279000
996	00:00:39.319000
997	00:00:39.358000
998	00:00:39.398000
999	00:00:39.437000
1000	00:00:39.477000
1001	00:00:39.516000
1002	00:00:39.556000
1003	00:00:39.595000
1004	00:00:39.635000
1005	00:00:39.674000
1006	00:00:39.714000
1007	00:00:39.753000
1008	00:00:39.793000
1009	00:00:39.832000
1010	00:00:39.872000
1011	00:00:39.911000
1012	00:00:39.951000
1013	00:00:39.990000
1014	00:00:40.030000
1015	00:00:40.069000
1016	00:00:40.109000
1017	00:00:40.149000
1018	00:00:40.188000
1019	00:00:40.228000
1020	00:00:40.267000
1021	00:00:40.307000
1022	00:00:40.346000
1023	00:00:40.386000
1024	00:00:40.425000
1025	00:00:40.465000
1026	00:00:40.504000
1027	00:00:40.544000
1028	00:00:40.583000
1029	00:00:40.623000
1030	00:00:40.662000
1031	00:00:40.702000
1032	00:00:40.741000
1033	00:00:40.781000
1034	00:00:40.820000
1035	00:00:40.860000
1036	00:00:40.899000
1037	00:00:40.939000
1038	00:00:40.978000
1039	00:00:41.018000
1040	00:00:41.057000
1041	00:00:41.097000
1042	00:00:41.136000
1043	00:00:41.176000
1044	00:00:41.215000
1045	00:00:41.255000
1046	00:00:41.294000
1047	00:00:41.334000
1048	00:00:41.373000
1049	00:00:41.413000
1050	00:00:41.452000
1051	00:00:41.492000
1052	00:00:41.531000
1053	00:00:41.571000
1054	00:00:41.611000
1055	00:00:41.650000
1056	00:00:41.690000
1057	00:00:41.729000
1058	00:00:41.769000
1059	00:00:41.808000
1060	00:00:41.848000
1061	00:00:41.887000
1062	00:00:41.927000
1063	00:00:41.966000
1064	00:00:42.006000
1065	00:00:42.045000
1066	00:00:42.085000
1067	00:00:42.124000
1068	00:00:42.164000
1069	00:00:42.203000
1070	00:00:42.243000
1071	00:00:42.282000
1072	00:00:42.322000
1073	00:00:42.361000
1074	00:00:42.401000
1075	00:00:42.440000
1076	00:00:42.480000
1077	00:00:42.519000
1078	00:00:42.559000
1079	00:00:42.598000
1080	00:00:42.638000
1081	00:00:42.677000
1082	00:00:42.717000
1083	00:00:42.756000
1084	00:00:42.796000
1085	00:00:42.835000
1086	00:00:42.875000
1087	00:00:42.914000
1088	00:00:42.954000
1089	00:00:42.993000
1090	00:00:43.033000
1091	00:00:43.072000
1092	00:00:43.112000
1093	00:00:43.152000
1094	00:00:43.191000
1095	00:00:43.230000
1096	00:00:43.270000
1097	00:00:43.310000
1098	00:00:43.349000
1099	00:00:43.388000
1100	00:00:43.428000
1101	00:00:43.468000
1102	00:00:43.507000
1103	00:00:43.547000
1104	00:00:43.586000
1105	00:00:43.626000
1106	00:00:43.665000
1107	00:00:43.705000
1108	00:00:43.744000
1109	00:00:43.784000
1110	00:00:43.823000
1111	00:00:43.863000
1112	00:00:43.902000
1113	00:00:43.942000
1114	00:00:43.981000
1115	00:00:44.021000
1116	00:00:44.060000
1117	00:00:44.100000
1118	00:00:44.139000
1119	00:00:44.179000
1120	00:00:44.218000
1121	00:00:44.258000
1122	00:00:44.297000
1123	00:00:44.337000
1124	00:00:44.376000
1125	00:00:44.416000
1126	00:00:44.455000
1127	00:00:44.495000
1128	00:00:44.534000
1129	00:00:44.574000
1130	00:00:44.613000
1131	00:00:44.653000
1132	00:00:44.692000
1133	00:00:44.732000
1134	00:00:44.771000
1135	00:00:44.811000
1136	00:00:44.850000
1137	00:00:44.890000
1138	00:00:44.930000
1139	00:00:44.969000
1140	00:00:45.009000
1141	00:00:45.048000
1142	00:00:45.088000
1143	00:00:45.127000
1144	00:00:45.167000
1145	00:00:45.206000
1146	00:00:45.246000
1147	00:00:45.286000
1148	00:00:45.326000
1149	00:00:45.365000
1150	00:00:45.405000
1151	00:00:45.444000
1152	00:00:45.484000
1153	00:00:45.523000
1154	00:00:45.563000
1155	00:00:45.602000
1156	00:00:45.642000
1157	00:00:45.681000
1158	00:00:45.721000
1159	00:00:45.760000
1160	00:00:45.800000
1161	00:00:45.839000
1162	00:00:45.879000
1163	00:00:45.918000
1164	00:00:45.958000
1165	00:00:45.997000
1166	00:00:46.037000
1167	00:00:46.076000
1168	00:00:46.116000
1169	00:00:46.155000
1170	00:00:46.195000
1171	00:00:46.234000
1172	00:00:46.274000
1173	00:00:46.313000
1174	00:00:46.353000
1175	00:00:46.392000
1176	00:00:46.432000
1177	00:00:46.472000
1178	00:00:46.511000
1179	00:00:46.551000
1180	00:00:46.590000
1181	00:00:46.630000
1182	00:00:46.669000
1183	00:00:46.709000
1184	00:00:46.748000
1185	00:00:46.788000
1186	00:00:46.827000
1187	00:00:46.867000
1188	00:00:46.906000
1189	00:00:46.946000
1190	00:00:46.985000
1191	00:00:47.025000
1192	00:00:47.064000
1193	00:00:47.104000
1194	00:00:47.143000
1195	00:00:47.183000
1196	00:00:47.222000
1197	00:00:47.262000
1198	00:00:47.301000
1199	00:00:47.341000
1200	00:00:47.380000
1201	00:00:47.420000
1202	00:00:47.459000
1203	00:00:47.499000
1204	00:00:47.538000
1205	00:00:47.578000
1206	00:00:47.617000
1207	00:00:47.657000
1208	00:00:47.696000
1209	00:00:47.736000
1210	00:00:47.775000
1211	00:00:47.815000
1212	00:00:47.854000
1213	00:00:47.894000
1214	00:00:47.934000
1215	00:00:47.973000
1216	00:00:48.013000
1217	00:00:48.052000
1218	00:00:48.091000
1219	00:00:48.131000
1220	00:00:48.170000
1221	00:00:48.210000
1222	00:00:48.250000
1223	00:00:48.289000
1224	00:00:48.329000
1225	00:00:48.368000

## Sheet: #5b
frame	time	PC	TB	ant isth	mid isth	post isth
1	00:00:00
2	00:00:00.040000
3	00:00:00.079000
4	00:00:00.132000
5	00:00:00.172000
6	00:00:00.212000
7	00:00:00.252000
8	00:00:00.292000
9	00:00:00.332000
10	00:00:00.372000
11	00:00:00.412000
12	00:00:00.452000
13	00:00:00.492000
14	00:00:00.532000
15	00:00:00.562000
16	00:00:00.602000
17	00:00:00.632000
18	00:00:00.672000
19	00:00:00.711000
20	00:00:00.751000
21	00:00:00.790000
22	00:00:00.830000
23	00:00:00.869000
24	00:00:00.909000
25	00:00:00.948000
26	00:00:00.988000
27	00:00:01.027000
28	00:00:01.067000
29	00:00:01.106000
30	00:00:01.146000
31	00:00:01.186000
32	00:00:01.225000
33	00:00:01.265000
34	00:00:01.304000
35	00:00:01.344000
36	00:00:01.383000
37	00:00:01.423000
38	00:00:01.462000
39	00:00:01.502000
40	00:00:01.541000
41	00:00:01.581000
42	00:00:01.620000
43	00:00:01.660000
44	00:00:01.699000
45	00:00:01.739000
46	00:00:01.778000
47	00:00:01.818000
48	00:00:01.857000
49	00:00:01.897000
50	00:00:01.936000
51	00:00:01.976000
52	00:00:02.015000
53	00:00:02.055000
54	00:00:02.094000
55	00:00:02.134000
56	00:00:02.173000
57	00:00:02.213000
58	00:00:02.252000
59	00:00:02.292000
60	00:00:02.331000
61	00:00:02.371000
62	00:00:02.410000
63	00:00:02.450000
64	00:00:02.489000
65	00:00:02.529000
66	00:00:02.568000
67	00:00:02.608000
68	00:00:02.647000
69	00:00:02.687000
70	00:00:02.727000
71	00:00:02.766000
72	00:00:02.806000
73	00:00:02.845000
74	00:00:02.885000
75	00:00:02.924000
76	00:00:02.963000
77	00:00:03.003000
78	00:00:03.043000
79	00:00:03.082000
80	00:00:03.122000
81	00:00:03.161000
82	00:00:03.201000
83	00:00:03.240000
84	00:00:03.280000
85	00:00:03.319000
86	00:00:03.359000
87	00:00:03.398000
88	00:00:03.438000
89	00:00:03.477000
90	00:00:03.517000
91	00:00:03.556000
92	00:00:03.596000
93	00:00:03.635000
94	00:00:03.675000
95	00:00:03.714000
96	00:00:03.754000
97	00:00:03.793000
98	00:00:03.833000
99	00:00:03.872000
100	00:00:03.912000
101	00:00:03.951000
102	00:00:03.991000
103	00:00:04.030000
104	00:00:04.070000
105	00:00:04.109000
106	00:00:04.149000
107	00:00:04.188000
108	00:00:04.228000
109	00:00:04.267000
110	00:00:04.307000
111	00:00:04.346000
112	00:00:04.386000
113	00:00:04.425000
114	00:00:04.465000
115	00:00:04.505000
116	00:00:04.544000
117	00:00:04.584000
118	00:00:04.623000
119	00:00:04.663000
120	00:00:04.702000
121	00:00:04.742000
122	00:00:04.781000
123	00:00:04.821000
124	00:00:04.860000
125	00:00:04.900000
126	00:00:04.939000
127	00:00:04.979000
128	00:00:05.018000
129	00:00:05.058000
130	00:00:05.097000
131	00:00:05.137000
132	00:00:05.176000
133	00:00:05.216000
134	00:00:05.255000
135	00:00:05.295000
136	00:00:05.334000
137	00:00:05.374000
138	00:00:05.413000
139	00:00:05.453000
140	00:00:05.492000
141	00:00:05.532000
142	00:00:05.571000
143	00:00:05.611000
144	00:00:05.650000
145	00:00:05.690000
146	00:00:05.729000
147	00:00:05.769000
148	00:00:05.808000
149	00:00:05.848000
150	00:00:05.887000
151	00:00:05.927000
152	00:00:05.966000
153	00:00:06.006000
154	00:00:06.046000
155	00:00:06.085000
156	00:00:06.125000
157	00:00:06.164000
158	00:00:06.204000
159	00:00:06.243000
160	00:00:06.283000
161	00:00:06.322000
162	00:00:06.362000
163	00:00:06.401000
164	00:00:06.441000
165	00:00:06.480000
166	00:00:06.520000
167	00:00:06.559000
168	00:00:06.599000
169	00:00:06.638000
170	00:00:06.678000
171	00:00:06.717000
172	00:00:06.757000
173	00:00:06.796000
174	00:00:06.836000
175	00:00:06.875000
176	00:00:06.915000
177	00:00:06.954000
178	00:00:06.994000
179	00:00:07.033000
180	00:00:07.073000
181	00:00:07.112000
182	00:00:07.152000
183	00:00:07.191000
184	00:00:07.231000
185	00:00:07.270000
186	00:00:07.310000
187	00:00:07.349000
188	00:00:07.389000
189	00:00:07.428000
190	00:00:07.468000
191	00:00:07.507000
192	00:00:07.547000
193	00:00:07.587000
194	00:00:07.626000
195	00:00:07.666000
196	00:00:07.705000
197	00:00:07.745000
198	00:00:07.784000
199	00:00:07.824000
200	00:00:07.863000
201	00:00:07.903000
202	00:00:07.942000
203	00:00:07.982000
204	00:00:08.021000
205	00:00:08.061000
206	00:00:08.100000
207	00:00:08.140000
208	00:00:08.179000
209	00:00:08.219000
210	00:00:08.258000
211	00:00:08.298000
212	00:00:08.337000
213	00:00:08.377000
214	00:00:08.416000
215	00:00:08.456000
216	00:00:08.495000
217	00:00:08.535000
218	00:00:08.574000
219	00:00:08.614000
220	00:00:08.653000
221	00:00:08.693000
222	00:00:08.732000
223	00:00:08.772000
224	00:00:08.811000
225	00:00:08.851000
226	00:00:08.890000
227	00:00:08.930000
228	00:00:08.969000
229	00:00:09.009000
230	00:00:09.049000
231	00:00:09.088000
232	00:00:09.127000
233	00:00:09.167000
234	00:00:09.206000
235	00:00:09.246000
236	00:00:09.285000
237	00:00:09.325000
238	00:00:09.365000
239	00:00:09.404000
240	00:00:09.444000
241	00:00:09.483000
242	00:00:09.523000
243	00:00:09.562000
244	00:00:09.602000
245	00:00:09.641000
246	00:00:09.681000
247	00:00:09.720000
248	00:00:09.760000
249	00:00:09.799000
250	00:00:09.839000
251	00:00:09.878000
252	00:00:09.918000
253	00:00:09.957000
254	00:00:09.997000
255	00:00:10.036000
256	00:00:10.076000
257	00:00:10.115000
258	00:00:10.155000
259	00:00:10.194000
260	00:00:10.234000
261	00:00:10.273000
262	00:00:10.313000
263	00:00:10.352000
264	00:00:10.392000
265	00:00:10.431000
266	00:00:10.471000
267	00:00:10.510000
268	00:00:10.550000
269	00:00:10.589000
270	00:00:10.629000
271	00:00:10.668000
272	00:00:10.708000
273	00:00:10.747000
274	00:00:10.787000
275	00:00:10.826000
276	00:00:10.866000
277	00:00:10.906000
278	00:00:10.945000
279	00:00:10.985000
280	00:00:11.024000
281	00:00:11.064000
282	00:00:11.103000
283	00:00:11.143000
284	00:00:11.182000
285	00:00:11.222000
286	00:00:11.261000
287	00:00:11.301000
288	00:00:11.340000
289	00:00:11.380000
290	00:00:11.419000
291	00:00:11.459000
292	00:00:11.498000
293	00:00:11.538000
294	00:00:11.577000
295	00:00:11.617000
296	00:00:11.656000
297	00:00:11.696000
298	00:00:11.735000
299	00:00:11.775000
300	00:00:11.814000
301	00:00:11.854000
302	00:00:11.893000
303	00:00:11.933000
304	00:00:11.972000
305	00:00:12.012000
306	00:00:12.051000
307	00:00:12.091000
308	00:00:12.130000
309	00:00:12.170000
310	00:00:12.209000
311	00:00:12.249000
312	00:00:12.288000
313	00:00:12.328000
314	00:00:12.368000
315	00:00:12.407000
316	00:00:12.447000
317	00:00:12.486000
318	00:00:12.526000
319	00:00:12.565000
320	00:00:12.605000
321	00:00:12.644000
322	00:00:12.684000
323	00:00:12.723000
324	00:00:12.763000
325	00:00:12.802000
326	00:00:12.842000
327	00:00:12.881000
328	00:00:12.921000
329	00:00:12.960000
330	00:00:13
331	00:00:13.039000
332	00:00:13.079000
333	00:00:13.118000
334	00:00:13.158000
335	00:00:13.197000
336	00:00:13.237000
337	00:00:13.276000
338	00:00:13.316000
339	00:00:13.355000
340	00:00:13.395000
341	00:00:13.434000
342	00:00:13.474000
343	00:00:13.513000
344	00:00:13.553000
345	00:00:13.592000
346	00:00:13.632000
347	00:00:13.671000
348	00:00:13.711000
349	00:00:13.750000
350	00:00:13.790000
351	00:00:13.829000
352	00:00:13.869000
353	00:00:13.908000
354	00:00:13.948000
355	00:00:13.988000
356	00:00:14.027000
357	00:00:14.066000
358	00:00:14.106000
359	00:00:14.146000
360	00:00:14.185000
361	00:00:14.225000
362	00:00:14.264000
363	00:00:14.304000
364	00:00:14.343000
365	00:00:14.383000
366	00:00:14.422000
367	00:00:14.462000
368	00:00:14.501000
369	00:00:14.541000
370	00:00:14.580000
371	00:00:14.620000
372	00:00:14.659000
373	00:00:14.699000
374	00:00:14.738000
375	00:00:14.778000
376	00:00:14.817000
377	00:00:14.857000
378	00:00:14.896000
379	00:00:14.936000
380	00:00:14.975000
381	00:00:15.015000
382	00:00:15.054000
383	00:00:15.094000
384	00:00:15.133000
385	00:00:15.173000
386	00:00:15.212000
387	00:00:15.252000
388	00:00:15.291000
389	00:00:15.331000
390	00:00:15.370000
391	00:00:15.410000
392	00:00:15.449000
393	00:00:15.489000
394	00:00:15.528000
395	00:00:15.568000
396	00:00:15.607000
397	00:00:15.647000
398	00:00:15.687000
399	00:00:15.726000
400	00:00:15.766000
401	00:00:15.805000
402	00:00:15.845000
403	00:00:15.884000
404	00:00:15.924000
405	00:00:15.963000
406	00:00:16.003000
407	00:00:16.042000
408	00:00:16.082000
409	00:00:16.121000
410	00:00:16.161000
411	00:00:16.200000
412	00:00:16.240000
413	00:00:16.279000
414	00:00:16.319000
415	00:00:16.358000
416	00:00:16.398000
417	00:00:16.437000
418	00:00:16.477000
419	00:00:16.516000
420	00:00:16.556000
421	00:00:16.595000
422	00:00:16.635000
423	00:00:16.674000
424	00:00:16.714000
425	00:00:16.753000
426	00:00:16.793000
427	00:00:16.832000
428	00:00:16.872000
429	00:00:16.911000
430	00:00:16.951000
431	00:00:16.990000
432	00:00:17.030000
433	00:00:17.069000
434	00:00:17.109000
435	00:00:17.148000
436	00:00:17.188000
437	00:00:17.228000
438	00:00:17.267000
439	00:00:17.307000
440	00:00:17.346000
441	00:00:17.386000
442	00:00:17.425000
443	00:00:17.465000
444	00:00:17.504000
445	00:00:17.544000
446	00:00:17.583000
447	00:00:17.623000
448	00:00:17.662000
449	00:00:17.702000
450	00:00:17.741000
451	00:00:17.781000
452	00:00:17.820000
453	00:00:17.860000
454	00:00:17.899000
455	00:00:17.939000
456	00:00:17.978000
457	00:00:18.018000
458	00:00:18.057000
459	00:00:18.097000
460	00:00:18.136000
461	00:00:18.176000
462	00:00:18.215000
463	00:00:18.255000
464	00:00:18.294000
465	00:00:18.334000
466	00:00:18.373000
467	00:00:18.413000
468	00:00:18.452000
469	00:00:18.492000
470	00:00:18.531000
471	00:00:18.571000
472	00:00:18.610000
473	00:00:18.650000
474	00:00:18.690000
475	00:00:18.729000
476	00:00:18.768000
477	00:00:18.808000
478	00:00:18.847000
479	00:00:18.887000
480	00:00:18.926000
481	00:00:18.966000
482	00:00:19.006000
483	00:00:19.045000
484	00:00:19.085000
485	00:00:19.124000
486	00:00:19.164000
487	00:00:19.203000
488	00:00:19.243000
489	00:00:19.282000
490	00:00:19.322000
491	00:00:19.361000
492	00:00:19.401000
493	00:00:19.440000
494	00:00:19.480000
495	00:00:19.519000
496	00:00:19.559000
497	00:00:19.598000
498	00:00:19.638000
499	00:00:19.677000
500	00:00:19.717000
501	00:00:19.756000
502	00:00:19.796000
503	00:00:19.835000
504	00:00:19.875000
505	00:00:19.914000
506	00:00:19.954000
507	00:00:19.993000
508	00:00:20.033000
509	00:00:20.072000
510	00:00:20.112000
511	00:00:20.151000
512	00:00:20.191000
513	00:00:20.230000
514	00:00:20.270000
515	00:00:20.309000
516	00:00:20.349000
517	00:00:20.388000
518	00:00:20.428000
519	00:00:20.467000
520	00:00:20.507000
521	00:00:20.547000
522	00:00:20.586000
523	00:00:20.626000
524	00:00:20.665000
525	00:00:20.705000
526	00:00:20.744000
527	00:00:20.784000
528	00:00:20.823000
529	00:00:20.863000
530	00:00:20.902000
531	00:00:20.942000
532	00:00:20.981000
533	00:00:21.021000
534	00:00:21.060000
535	00:00:21.100000
536	00:00:21.139000
537	00:00:21.179000
538	00:00:21.218000
539	00:00:21.258000
540	00:00:21.297000
541	00:00:21.337000
542	00:00:21.376000
543	00:00:21.416000
544	00:00:21.455000
545	00:00:21.495000
546	00:00:21.534000
547	00:00:21.574000
548	00:00:21.613000
549	00:00:21.653000
550	00:00:21.692000
551	00:00:21.732000
552	00:00:21.771000
553	00:00:21.811000
554	00:00:21.850000
555	00:00:21.890000
556	00:00:21.929000
557	00:00:21.969000
558	00:00:22.009000
559	00:00:22.048000
560	00:00:22.088000
561	00:00:22.127000
562	00:00:22.167000
563	00:00:22.206000
564	00:00:22.246000
565	00:00:22.285000
566	00:00:22.325000
567	00:00:22.364000
568	00:00:22.404000
569	00:00:22.443000
570	00:00:22.483000
571	00:00:22.522000
572	00:00:22.562000
573	00:00:22.601000
574	00:00:22.641000
575	00:00:22.680000
576	00:00:22.720000
577	00:00:22.759000
578	00:00:22.799000
579	00:00:22.838000
580	00:00:22.878000
581	00:00:22.917000
582	00:00:22.957000
583	00:00:22.996000
584	00:00:23.036000
585	00:00:23.075000
586	00:00:23.115000
587	00:00:23.154000
588	00:00:23.194000
589	00:00:23.233000
590	00:00:23.273000
591	00:00:23.312000
592	00:00:23.352000
593	00:00:23.391000
594	00:00:23.431000
595	00:00:23.470000
596	00:00:23.510000
597	00:00:23.549000
598	00:00:23.589000
599	00:00:23.628000
600	00:00:23.668000
601	00:00:23.707000
602	00:00:23.747000
603	00:00:23.786000
604	00:00:23.826000
605	00:00:23.866000
606	00:00:23.905000
607	00:00:23.945000
608	00:00:23.984000
609	00:00:24.024000
610	00:00:24.063000
611	00:00:24.103000
612	00:00:24.142000
613	00:00:24.182000
614	00:00:24.221000
615	00:00:24.261000
616	00:00:24.300000
617	00:00:24.340000
618	00:00:24.379000
619	00:00:24.419000
620	00:00:24.458000
621	00:00:24.498000
622	00:00:24.537000
623	00:00:24.577000
624	00:00:24.616000
625	00:00:24.656000
626	00:00:24.695000
627	00:00:24.735000
628	00:00:24.774000
629	00:00:24.814000
630	00:00:24.853000
631	00:00:24.893000

## Sheet: #6b
frame	time	PC	TB	ant isth	mid isth	post isth
1000	00:00:39.476000
1001	00:00:39.516000
1002	00:00:39.556000
1003	00:00:39.595000
1004	00:00:39.635000
1005	00:00:39.674000
1006	00:00:39.714000
1007	00:00:39.753000
1008	00:00:39.793000
1009	00:00:39.832000
1010	00:00:39.872000
1011	00:00:39.911000
1012	00:00:39.951000
1013	00:00:39.990000
1014	00:00:40.030000
1015	00:00:40.069000
1016	00:00:40.109000
1017	00:00:40.148000
1018	00:00:40.188000
1019	00:00:40.227000
1020	00:00:40.267000
1021	00:00:40.306000
1022	00:00:40.346000
1023	00:00:40.385000
1024	00:00:40.425000
1025	00:00:40.464000
1026	00:00:40.504000
1027	00:00:40.543000
1028	00:00:40.583000
1029	00:00:40.622000
1030	00:00:40.662000
1031	00:00:40.701000
1032	00:00:40.741000
1033	00:00:40.780000
1034	00:00:40.820000
1035	00:00:40.859000
1036	00:00:40.899000
1037	00:00:40.938000
1038	00:00:40.978000
1039	00:00:41.018000
1040	00:00:41.057000
1041	00:00:41.097000
1042	00:00:41.136000
1043	00:00:41.176000
1044	00:00:41.215000
1045	00:00:41.255000
1046	00:00:41.294000
1047	00:00:41.334000
1048	00:00:41.373000
1049	00:00:41.413000
1050	00:00:41.452000
1051	00:00:41.492000
1052	00:00:41.531000
1053	00:00:41.571000
1054	00:00:41.610000
1055	00:00:41.650000
1056	00:00:41.689000
1057	00:00:41.729000
1058	00:00:41.768000
1059	00:00:41.808000
1060	00:00:41.847000
1061	00:00:41.887000
1062	00:00:41.926000
1063	00:00:41.966000
1064	00:00:42.005000
1065	00:00:42.045000
1066	00:00:42.084000
1067	00:00:42.124000
1068	00:00:42.163000
1069	00:00:42.203000
1070	00:00:42.242000
1071	00:00:42.282000
1072	00:00:42.321000
1073	00:00:42.361000
1074	00:00:42.400000
1075	00:00:42.440000
1076	00:00:42.479000
1077	00:00:42.519000
1078	00:00:42.559000
1079	00:00:42.598000
1080	00:00:42.637000
1081	00:00:42.677000
1082	00:00:42.716000
1083	00:00:42.756000
1084	00:00:42.795000
1085	00:00:42.835000
1086	00:00:42.875000
1087	00:00:42.914000
1088	00:00:42.954000
1089	00:00:42.993000
1090	00:00:43.033000
1091	00:00:43.072000
1092	00:00:43.112000
1093	00:00:43.151000
1094	00:00:43.191000
1095	00:00:43.230000
1096	00:00:43.270000
1097	00:00:43.309000
1098	00:00:43.349000
1099	00:00:43.388000
1100	00:00:43.428000
1101	00:00:43.467000
1102	00:00:43.507000
1103	00:00:43.546000
1104	00:00:43.586000
1105	00:00:43.625000
1106	00:00:43.665000
1107	00:00:43.704000
1108	00:00:43.744000
1109	00:00:43.783000
1110	00:00:43.823000
1111	00:00:43.862000
1112	00:00:43.902000
1113	00:00:43.941000
1114	00:00:43.981000
1115	00:00:44.020000
1116	00:00:44.060000
1117	00:00:44.099000
1118	00:00:44.139000
1119	00:00:44.178000
1120	00:00:44.218000
1121	00:00:44.257000
1122	00:00:44.297000
1123	00:00:44.337000
1124	00:00:44.376000
1125	00:00:44.416000
1126	00:00:44.455000
1127	00:00:44.495000
1128	00:00:44.534000
1129	00:00:44.574000
1130	00:00:44.613000
1131	00:00:44.653000
1132	00:00:44.692000
1133	00:00:44.732000
1134	00:00:44.771000
1135	00:00:44.811000
1136	00:00:44.850000
1137	00:00:44.890000
1138	00:00:44.929000
1139	00:00:44.969000
1140	00:00:45.008000
1141	00:00:45.048000
1142	00:00:45.087000
1143	00:00:45.127000
1144	00:00:45.166000
1145	00:00:45.206000
1146	00:00:45.245000
1147	00:00:45.286000
1148	00:00:45.325000
1149	00:00:45.365000
1150	00:00:45.404000
1151	00:00:45.444000
1152	00:00:45.483000
1153	00:00:45.523000
1154	00:00:45.562000
1155	00:00:45.602000
1156	00:00:45.641000
1157	00:00:45.681000
1158	00:00:45.720000
1159	00:00:45.760000
1160	00:00:45.799000
1161	00:00:45.839000
1162	00:00:45.879000
1163	00:00:45.918000
1164	00:00:45.958000
1165	00:00:45.997000
1166	00:00:46.037000
1167	00:00:46.076000
1168	00:00:46.116000
1169	00:00:46.155000
1170	00:00:46.195000
1171	00:00:46.234000
1172	00:00:46.274000
1173	00:00:46.313000
1174	00:00:46.353000
1175	00:00:46.392000
1176	00:00:46.432000
1177	00:00:46.471000
1178	00:00:46.511000
1179	00:00:46.550000
1180	00:00:46.590000
1181	00:00:46.629000
1182	00:00:46.669000
1183	00:00:46.708000
1184	00:00:46.748000
1185	00:00:46.787000
1186	00:00:46.827000
1187	00:00:46.866000
1188	00:00:46.906000
1189	00:00:46.945000
1190	00:00:46.985000
1191	00:00:47.024000
1192	00:00:47.064000
1193	00:00:47.103000
1194	00:00:47.143000
1195	00:00:47.182000
1196	00:00:47.222000
1197	00:00:47.261000
1198	00:00:47.301000
1199	00:00:47.340000
1200	00:00:47.380000
1201	00:00:47.419000
1202	00:00:47.459000
1203	00:00:47.498000
1204	00:00:47.538000
1205	00:00:47.577000
1206	00:00:47.617000
1207	00:00:47.657000
1208	00:00:47.696000
1209	00:00:47.736000
1210	00:00:47.775000
1211	00:00:47.815000
1212	00:00:47.854000
1213	00:00:47.894000
1214	00:00:47.933000
1215	00:00:47.973000
1216	00:00:48.012000
1217	00:00:48.052000
1218	00:00:48.091000
1219	00:00:48.131000
1220	00:00:48.170000
1221	00:00:48.210000
1222	00:00:48.249000
1223	00:00:48.289000
1224	00:00:48.328000
1225	00:00:48.368000
1226	00:00:48.407000
1227	00:00:48.447000
1228	00:00:48.486000
1229	00:00:48.526000
1230	00:00:48.565000
1231	00:00:48.605000
1232	00:00:48.644000
1233	00:00:48.684000
1234	00:00:48.723000
1235	00:00:48.763000
1236	00:00:48.802000
1237	00:00:48.842000
1238	00:00:48.881000
1239	00:00:48.921000
1240	00:00:48.960000
1241	00:00:49
1242	00:00:49.039000
1243	00:00:49.079000
1244	00:00:49.118000
1245	00:00:49.158000
1246	00:00:49.198000
1247	00:00:49.237000
1248	00:00:49.277000
1249	00:00:49.316000
1250	00:00:49.356000
1251	00:00:49.395000
1252	00:00:49.435000
1253	00:00:49.474000
1254	00:00:49.514000
1255	00:00:49.553000
1256	00:00:49.593000
1257	00:00:49.632000
1258	00:00:49.672000
1259	00:00:49.711000
1260	00:00:49.751000
1261	00:00:49.790000
1262	00:00:49.830000
1263	00:00:49.869000
1264	00:00:49.909000
1265	00:00:49.948000
1266	00:00:49.988000
1267	00:00:50.027000
1268	00:00:50.067000
1269	00:00:50.106000
1270	00:00:50.146000
1271	00:00:50.185000
1272	00:00:50.225000
1273	00:00:50.264000
1274	00:00:50.304000
1275	00:00:50.343000
1276	00:00:50.383000
1277	00:00:50.422000
1278	00:00:50.462000
1279	00:00:50.501000
1280	00:00:50.541000
1281	00:00:50.580000
1282	00:00:50.620000
1283	00:00:50.660000
1284	00:00:50.699000
1285	00:00:50.739000
1286	00:00:50.778000
1287	00:00:50.818000
1288	00:00:50.857000
1289	00:00:50.897000
1290	00:00:50.936000
1291	00:00:50.976000
1292	00:00:51.015000
1293	00:00:51.055000
1294	00:00:51.094000
1295	00:00:51.134000
1296	00:00:51.173000
1297	00:00:51.213000
1298	00:00:51.252000
1299	00:00:51.292000
1300	00:00:51.331000
1301	00:00:51.371000
1302	00:00:51.410000
1303	00:00:51.450000
1304	00:00:51.489000
1305	00:00:51.529000
1306	00:00:51.568000
1307	00:00:51.608000
1308	00:00:51.647000
1309	00:00:51.687000
1310	00:00:51.726000
1311	00:00:51.766000
1312	00:00:51.805000
1313	00:00:51.845000
1314	00:00:51.884000
1315	00:00:51.924000
1316	00:00:51.963000
1317	00:00:52.003000
1318	00:00:52.042000
1319	00:00:52.082000
1320	00:00:52.121000
1321	00:00:52.161000
1322	00:00:52.201000
1323	00:00:52.240000
1324	00:00:52.280000
1325	00:00:52.319000
1326	00:00:52.358000
1327	00:00:52.398000
1328	00:00:52.437000
1329	00:00:52.477000
1330	00:00:52.517000
1331	00:00:52.556000
1332	00:00:52.596000
1333	00:00:52.635000
1334	00:00:52.675000
1335	00:00:52.714000
1336	00:00:52.754000
1337	00:00:52.793000
1338	00:00:52.833000
1339	00:00:52.872000
1340	00:00:52.912000
1341	00:00:52.951000
1342	00:00:52.991000
1343	00:00:53.030000
1344	00:00:53.070000
1345	00:00:53.109000
1346	00:00:53.149000
1347	00:00:53.188000
1348	00:00:53.228000
1349	00:00:53.267000
1350	00:00:53.307000
1351	00:00:53.346000
1352	00:00:53.386000
1353	00:00:53.425000
1354	00:00:53.465000
1355	00:00:53.504000
1356	00:00:53.544000
1357	00:00:53.583000
1358	00:00:53.623000
1359	00:00:53.662000
1360	00:00:53.702000
1361	00:00:53.741000
1362	00:00:53.781000
1363	00:00:53.820000
1364	00:00:53.860000
1365	00:00:53.899000
1366	00:00:53.939000
1367	00:00:53.979000
1368	00:00:54.018000
1369	00:00:54.058000
1370	00:00:54.097000
1371	00:00:54.137000
1372	00:00:54.176000
1373	00:00:54.216000
1374	00:00:54.255000
1375	00:00:54.295000
1376	00:00:54.334000
1377	00:00:54.374000
1378	00:00:54.413000
1379	00:00:54.453000
1380	00:00:54.492000
1381	00:00:54.532000
1382	00:00:54.571000
1383	00:00:54.611000
1384	00:00:54.650000
1385	00:00:54.690000
1386	00:00:54.729000
1387	00:00:54.769000
1388	00:00:54.808000
1389	00:00:54.848000
1390	00:00:54.887000
1391	00:00:54.927000
1392	00:00:54.966000
1393	00:00:55.006000
1394	00:00:55.045000
1395	00:00:55.085000
1396	00:00:55.124000
1397	00:00:55.164000
1398	00:00:55.203000
1399	00:00:55.243000
1400	00:00:55.283000
1401	00:00:55.323000
1402	00:00:55.362000
1403	00:00:55.402000
1404	00:00:55.441000
1405	00:00:55.481000
1406	00:00:55.521000
1407	00:00:55.560000
1408	00:00:55.600000
1409	00:00:55.639000
1410	00:00:55.679000
1411	00:00:55.718000
1412	00:00:55.758000
1413	00:00:55.797000
1414	00:00:55.837000
1415	00:00:55.876000
1416	00:00:55.916000
1417	00:00:55.955000
1418	00:00:55.995000
1419	00:00:56.034000
1420	00:00:56.074000
1421	00:00:56.113000
1422	00:00:56.153000
1423	00:00:56.192000
1424	00:00:56.232000
1425	00:00:56.271000
1426	00:00:56.311000
1427	00:00:56.350000
1428	00:00:56.390000
1429	00:00:56.429000
1430	00:00:56.469000
1431	00:00:56.508000
1432	00:00:56.548000
1433	00:00:56.587000
1434	00:00:56.627000
1435	00:00:56.666000
1436	00:00:56.706000
1437	00:00:56.745000
1438	00:00:56.785000
1439	00:00:56.824000
1440	00:00:56.864000
1441	00:00:56.903000
1442	00:00:56.943000
1443	00:00:56.982000
1444	00:00:57.022000
1445	00:00:57.061000
1446	00:00:57.101000
1447	00:00:57.140000
1448	00:00:57.180000
1449	00:00:57.219000
1450	00:00:57.259000
1451	00:00:57.299000
1452	00:00:57.338000
1453	00:00:57.378000
1454	00:00:57.417000
1455	00:00:57.457000
1456	00:00:57.496000
1457	00:00:57.536000
1458	00:00:57.575000
1459	00:00:57.615000
1460	00:00:57.654000
1461	00:00:57.694000
1462	00:00:57.733000
1463	00:00:57.773000
1464	00:00:57.812000
1465	00:00:57.852000
1466	00:00:57.891000
1467	00:00:57.931000
1468	00:00:57.970000
1469	00:00:58.010000
1470	00:00:58.049000
1471	00:00:58.089000
1472	00:00:58.128000
1473	00:00:58.168000
1474	00:00:58.207000
1475	00:00:58.247000
1476	00:00:58.286000
1477	00:00:58.326000
1478	00:00:58.365000
1479	00:00:58.405000
1480	00:00:58.444000
1481	00:00:58.484000
1482	00:00:58.523000
1483	00:00:58.563000
1484	00:00:58.602000
1485	00:00:58.642000
1486	00:00:58.681000
1487	00:00:58.721000
1488	00:00:58.760000
1489	00:00:58.800000
1490	00:00:58.840000
1491	00:00:58.879000
1492	00:00:58.919000
1493	00:00:58.958000
1494	00:00:58.998000
1495	00:00:59.037000
1496	00:00:59.077000
1497	00:00:59.116000
1498	00:00:59.156000
1499	00:00:59.195000
1500	00:00:59.235000
1501	00:00:59.274000
1502	00:00:59.314000
1503	00:00:59.353000
1504	00:00:59.393000
1505	00:00:59.432000
1506	00:00:59.472000
1507	00:00:59.511000
1508	00:00:59.551000
1509	00:00:59.590000
1510	00:00:59.630000
1511	00:00:59.669000
1512	00:00:59.709000
1513	00:00:59.748000
1514	00:00:59.788000
1515	00:00:59.827000
1516	00:00:59.867000
1517	00:00:59.906000

[truncated: 7 more sheets: #7b, #4c, #5c, #6c, #7c, #8c, #9c]
